# Supplementary material for: Synthesis and opto-electrochemical properties of tribenzo[a,c,i]phenazine derivatives for hole transport materials
Source: Royal Society of Chemistry journal article supplement (doi:10.1039/c6ra20964e), 2016-01-01
Supplement: c6ra20964e1.pdf [file c6ra20964e1.pdf]

**Synthesis and opto-electrochemical properties of tribenzo[*a,c,i*]phenazine  
derivatives for hole transport materials**

**Azam M. Shaikh,<sup>a</sup> Bharat K. Sharma,<sup>a</sup> Sajeev Chacko<sup>b</sup> and Rajesh M. Kamble<sup>\*a</sup>**

*<sup>a</sup>Department of Chemistry, University of Mumbai, Santacruz (East), Mumbai–400 098, India*

*<sup>b</sup>Department of Physics, University of Mumbai, Santacruz (East), Mumbai–400 098, India*

\*Email: [kamblerm@chem.mu.ac.in](mailto:kamblerm@chem.mu.ac.in)

**Supplementary Information**

|                                                                                                                     |       |
|---------------------------------------------------------------------------------------------------------------------|-------|
| 1) Mass spectra of compound 1.....                                                                                  | 3     |
| 2) HRMS spectra of compounds 2 6 .....                                                                              | 4 8   |
| 3) FTIR Spectra of compounds 1 6 .....                                                                              | 9 11  |
| 4) <sup>1</sup> H and <sup>13</sup> C NMR spectra of compounds 1 6.....                                             | 12 17 |
| 5) Photophysical data of compounds 2 6 in various solvents.....                                                     | 18 19 |
| 6) Absorption spectra of compound 1 in toluene.....                                                                 | 19    |
| 7) Absorption and Fluorescence spectra of compound 2 6 in various solvents.....                                     | 20 21 |
| 8) Emission of compounds 2 6 in various solvents.....                                                               | 22    |
| 9) Cyclic voltammetry (CV) of compounds 2–6 in anhydrous dichloromethane.....                                       | 23    |
| 10) Differential Scanning Calorimetry of 2 6.....                                                                   | 24    |
| 11) Optimized structures of compounds of 2 6.....                                                                   | 25 27 |
| 12) Cartesian coordinates and Mulliken and Lowdin charges of compounds 2 6.....                                     | 28 40 |
| a. <b>Table S1.</b> Cartesian coordinates and Mulliken and Lowdin charges of optimized structure of compound 2..... | 28 30 |
| b. <b>Table S2.</b> Cartesian coordinates and Mulliken and Lowdin charges of optimized structure of compound 3..... | 30 32 |
| c. <b>Table S3.</b> Cartesian coordinates and Mulliken and Lowdin charges of optimized structure of compound 4..... | 32 35 |
| d. <b>Table S4.</b> Cartesian coordinates and Mulliken and Lowdin charges of optimized structure of compound 5..... | 35 38 |
| e. <b>Table S5.</b> Cartesian coordinates and Mulliken and Lowdin charges of optimized structure of compound 6..... | 38 40 |

# 1. Mass spectra of compound 1

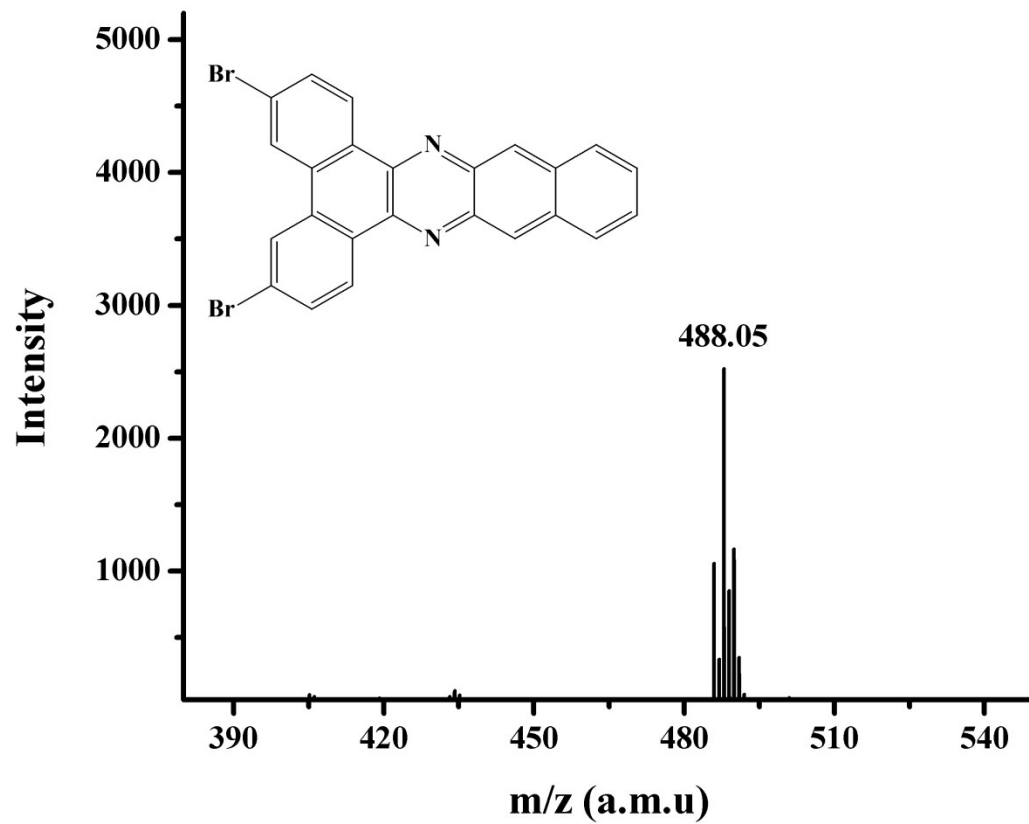

## 2. HRMS spectra of compounds 2 6

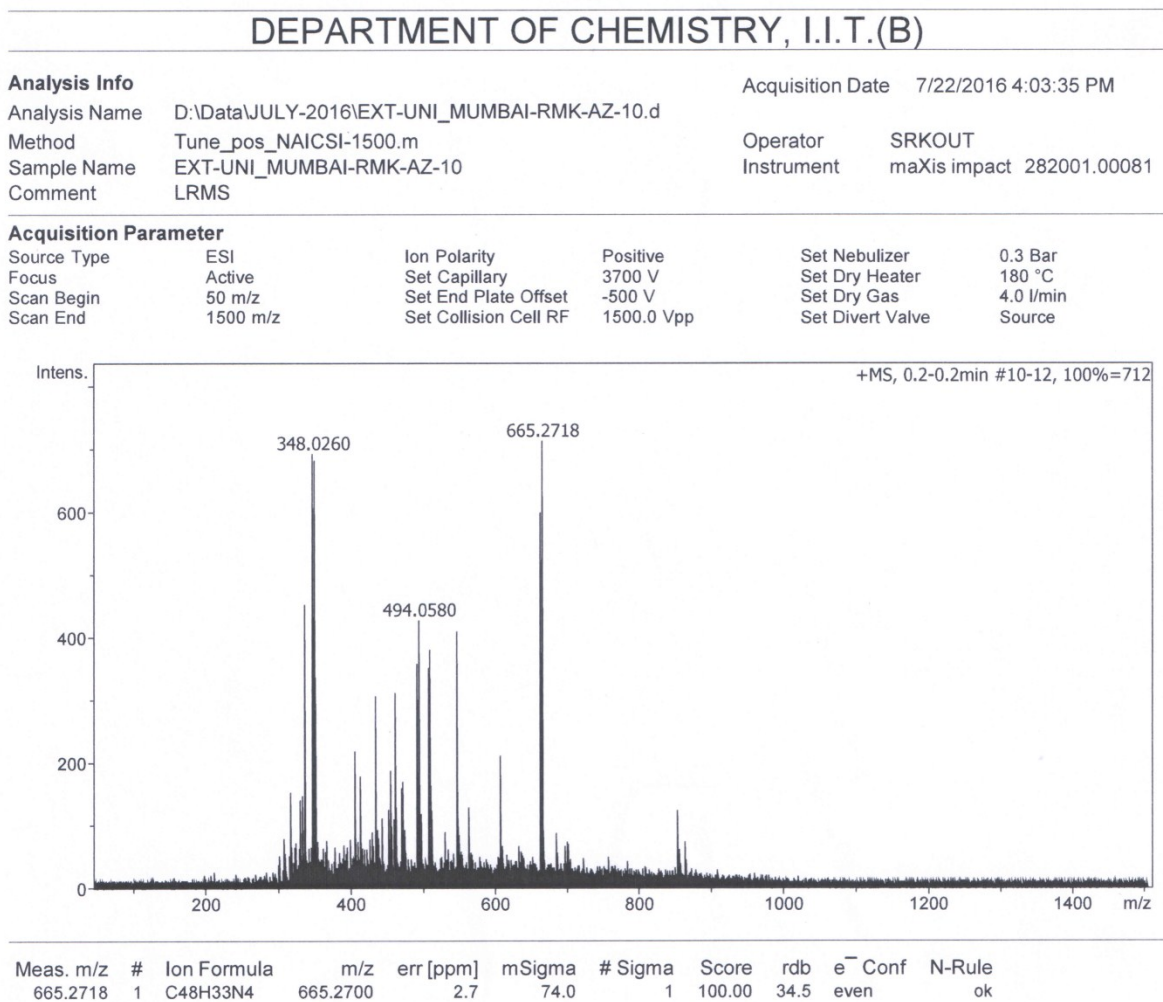

**Fig. S1** HRMS spectra of compound 2

**DEPARTMENT OF CHEMISTRY, I.I.T.(B)**

**Analysis Info**

Analysis Name D:\Data\JULY-2016\EXT-UNI\_MUM\_RMK-AZ-11.d  
 Method Tune\_pos\_NAF-1500.m  
 Sample Name EXT-UNI\_MUM\_RMK-AZ-11  
 Comment C56H36N4

Acquisition Date 7/25/2016 4:10:56 PM

Operator raf out  
 Instrument maXis impact 282001.00081

**Acquisition Parameter**

|             |          |                       |            |                  |           |
|-------------|----------|-----------------------|------------|------------------|-----------|
| Source Type | ESI      | Ion Polarity          | Positive   | Set Nebulizer    | 0.3 Bar   |
| Focus       | Active   | Set Capillary         | 3700 V     | Set Dry Heater   | 180 °C    |
| Scan Begin  | 50 m/z   | Set End Plate Offset  | -500 V     | Set Dry Gas      | 4.0 l/min |
| Scan End    | 1500 m/z | Set Collision Cell RF | 1500.0 Vpp | Set Divert Valve | Source    |

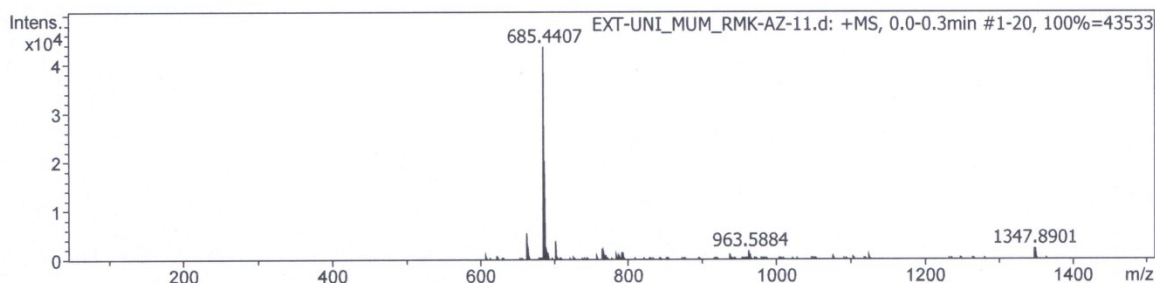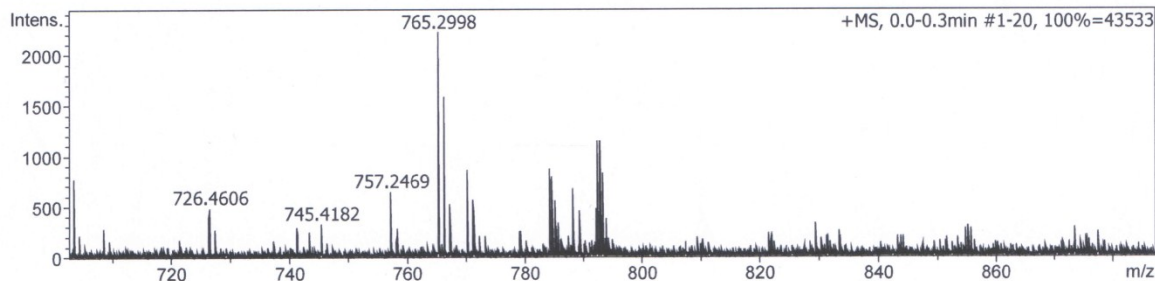

| Meas. m/z | # | Ion Formula | m/z      | err [ppm] | mSigma | # Sigma | Score  | rdb  | e <sup>-</sup> Conf | N-Rule |
|-----------|---|-------------|----------|-----------|--------|---------|--------|------|---------------------|--------|
| 765.2998  | 1 | C56H37N4    | 765.3013 | 1.9       | 47.0   | 1       | 100.00 | 40.5 | even                | ok     |

**Fig. S2 HRMS spectra of compound 3**

DEPARTMENT OF CHEMISTRY, I.I.T.(B)

|                      |                                           |                  |                           |
|----------------------|-------------------------------------------|------------------|---------------------------|
| <b>Analysis Info</b> |                                           | Acquisition Date | 7/25/2016 4:22:26 PM      |
| Analysis Name        | D:\Data\JULY-2016\EXT-UNI_MUM_RMK-AZ-12.d | Operator         | raf out                   |
| Method               | Tune_pos_NAF-1500.m                       | Instrument       | maXis impact 282001.00081 |
| Sample Name          | EXT-UNI_MUM_RMK-AZ-12                     |                  |                           |
| Comment              | C52H40N4O4                                |                  |                           |

|                              |          |                       |            |                  |           |
|------------------------------|----------|-----------------------|------------|------------------|-----------|
| <b>Acquisition Parameter</b> |          |                       |            |                  |           |
| Source Type                  | ESI      | Ion Polarity          | Positive   | Set Nebulizer    | 0.3 Bar   |
| Focus                        | Active   | Set Capillary         | 3700 V     | Set Dry Heater   | 180 °C    |
| Scan Begin                   | 50 m/z   | Set End Plate Offset  | -500 V     | Set Dry Gas      | 4.0 l/min |
| Scan End                     | 1500 m/z | Set Collision Cell RF | 1500.0 Vpp | Set Divert Valve | Source    |

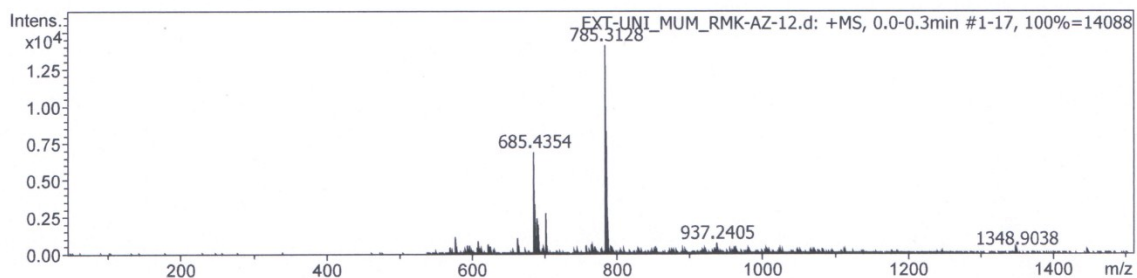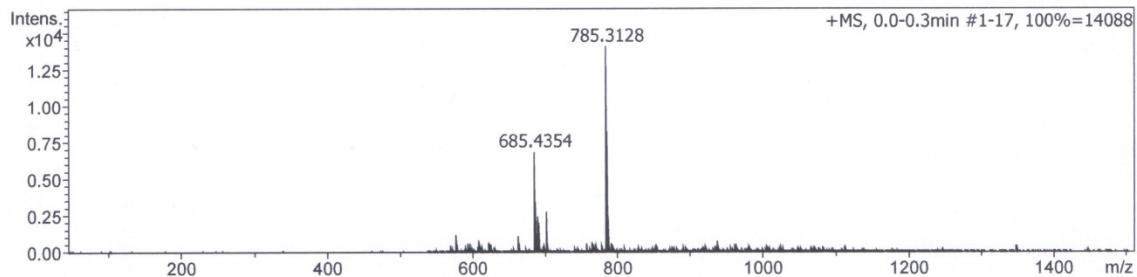

| Meas. m/z | # | Ion Formula | m/z      | err [ppm] | mSigma | # Sigma | Score  | rdb  | e <sup>-</sup> Conf | N-Rule |
|-----------|---|-------------|----------|-----------|--------|---------|--------|------|---------------------|--------|
| 785.3128  | 1 | C52H41N4O4  | 785.3122 | -0.7      | 12.7   | 1       | 100.00 | 34.5 | even                | ok     |

**Fig. S3** HRMS spectra of compounds **4**

DEPARTMENT OF CHEMISTRY, I.I.T.(B)

|                      |                                           |                  |                           |
|----------------------|-------------------------------------------|------------------|---------------------------|
| <b>Analysis Info</b> |                                           | Acquisition Date | 7/25/2016 4:44:16 PM      |
| Analysis Name        | D:\Data\JULY-2016\EXT-UNI_MUM_RMK-AZ-13.d | Operator         | raf out                   |
| Method               | Tune_pos_NAF-1500.m                       | Instrument       | maXis impact 282001.00081 |
| Sample Name          | EXT-UNI_MUM_RMK-AZ-13                     |                  |                           |
| Comment              | C60H40N8                                  |                  |                           |

|                              |          |                       |            |                  |           |
|------------------------------|----------|-----------------------|------------|------------------|-----------|
| <b>Acquisition Parameter</b> |          |                       |            |                  |           |
| Source Type                  | ESI      | Ion Polarity          | Positive   | Set Nebulizer    | 0.3 Bar   |
| Focus                        | Active   | Set Capillary         | 3700 V     | Set Dry Heater   | 180 °C    |
| Scan Begin                   | 50 m/z   | Set End Plate Offset  | -500 V     | Set Dry Gas      | 4.0 l/min |
| Scan End                     | 1500 m/z | Set Collision Cell RF | 2100.0 Vpp | Set Divert Valve | Source    |

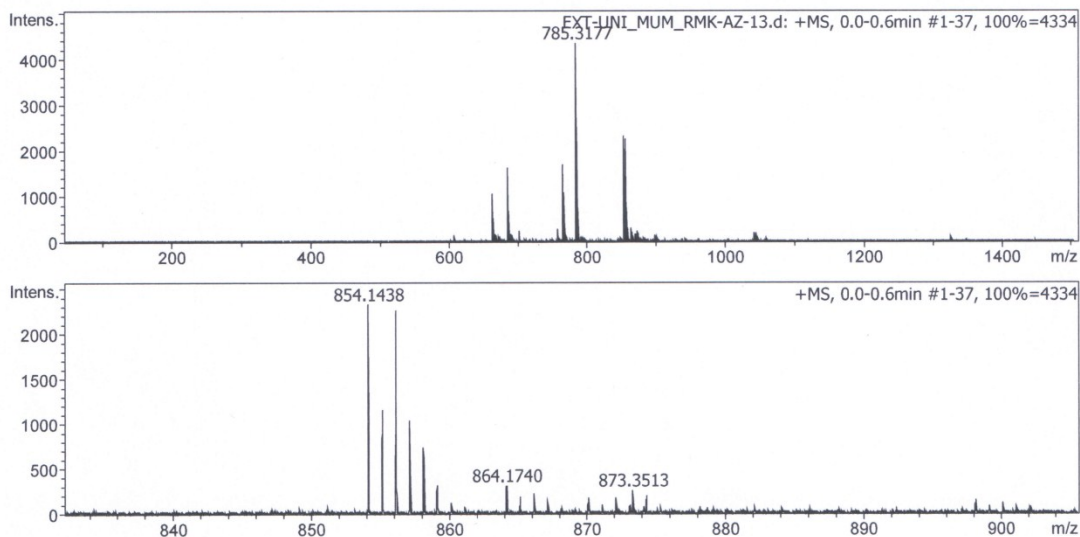

| Meas. m/z | # | Ion Formula | m/z      | err [ppm] | mSigma | # Sigma | Score  | rdb  | e <sup>-</sup> Conf | N-Rule |
|-----------|---|-------------|----------|-----------|--------|---------|--------|------|---------------------|--------|
| 873.3513  | 1 | C60H41N8    | 873.3496 | -1.6      | 527.8  | 1       | 100.00 | 44.5 | even                | ok     |

**Fig. S4** HRMS spectra of compound **5**

DEPARTMENT OF CHEMISTRY, I.I.T.(B)

**Analysis Info**

Analysis Name D:\Data\JULY-2016\EXT-UNI\_MUM\_RMK-AZ-14.d  
 Method Tune\_pos\_NAF-1000.m  
 Sample Name EXT-UNI\_MUM\_RMK-AZ-14  
 Comment C32H28N4O2

Acquisition Date 7/25/2016 4:58:13 PM

Operator raf out  
 Instrument maXis impact 282001.00081

**Acquisition Parameter**

|             |          |                       |           |                  |           |
|-------------|----------|-----------------------|-----------|------------------|-----------|
| Source Type | ESI      | Ion Polarity          | Positive  | Set Nebulizer    | 0.3 Bar   |
| Focus       | Active   | Set Capillary         | 3700 V    | Set Dry Heater   | 180 °C    |
| Scan Begin  | 50 m/z   | Set End Plate Offset  | -500 V    | Set Dry Gas      | 4.0 l/min |
| Scan End    | 1000 m/z | Set Collision Cell RF | 900.0 Vpp | Set Divert Valve | Source    |

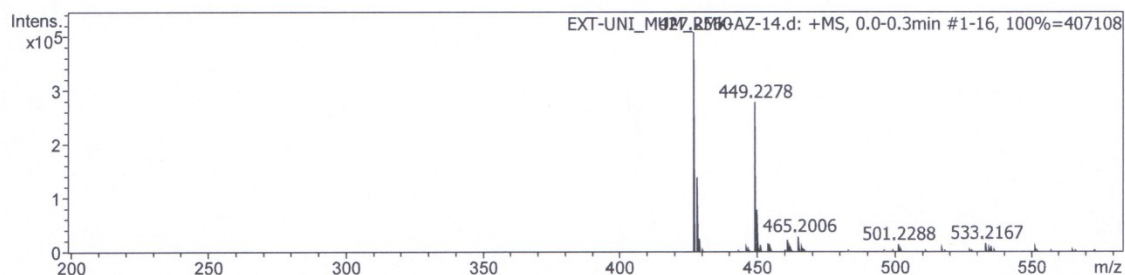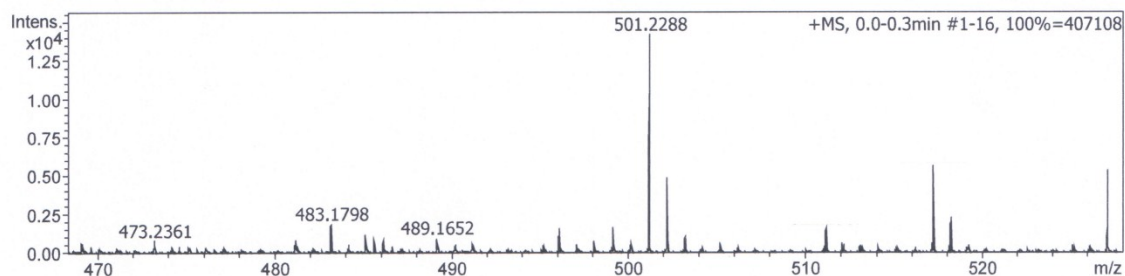

| Meas. m/z | # | Ion Formula | m/z      | err [ppm] | mSigma | # Sigma | Score  | rdb  | e <sup>-</sup> Conf | N-Rule |
|-----------|---|-------------|----------|-----------|--------|---------|--------|------|---------------------|--------|
| 501.2288  | 1 | C32H29N4O2  | 501.2285 | -0.6      | 10.2   | 1       | 100.00 | 20.5 | even                | ok     |

**Fig. S5** HRMS spectra of compound **6**



### 3. FTIR Spectra of compounds 1 6

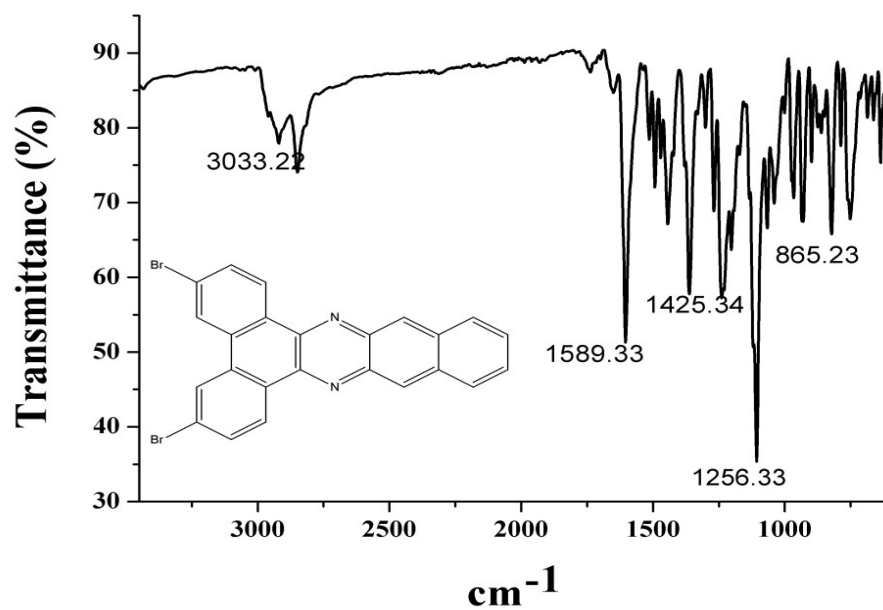

Fig. S6 FTIR Spectra of compound 1

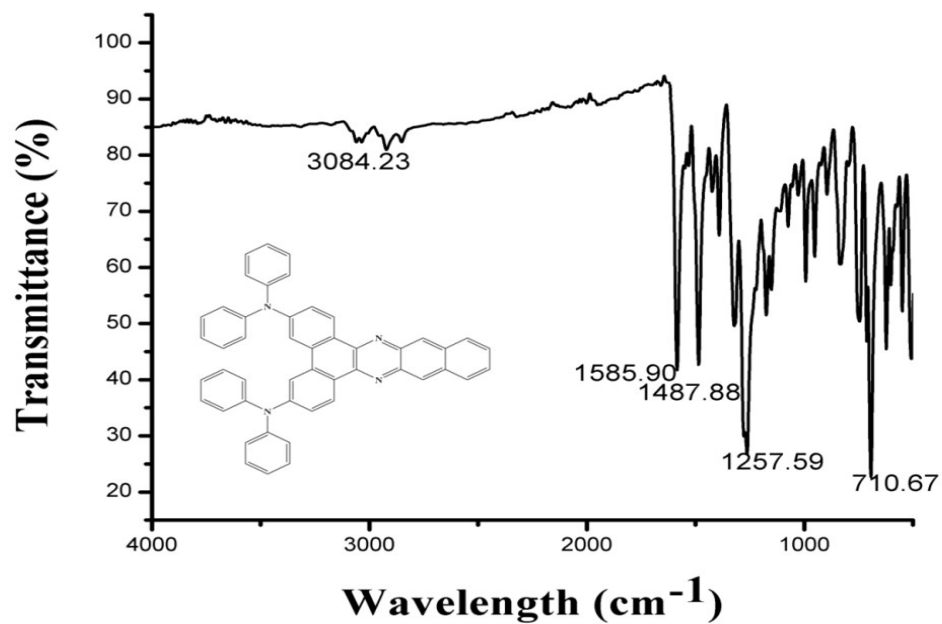

Fig. S7 FTIR Spectra of compound 2

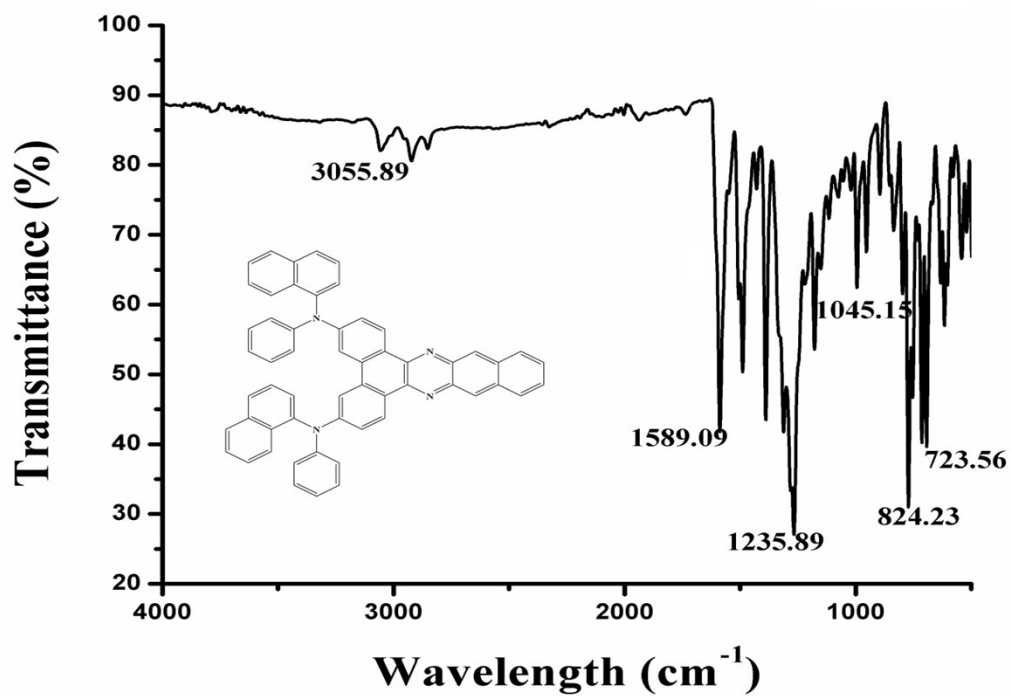

Fig. S8 FTIR Spectra of compound 3

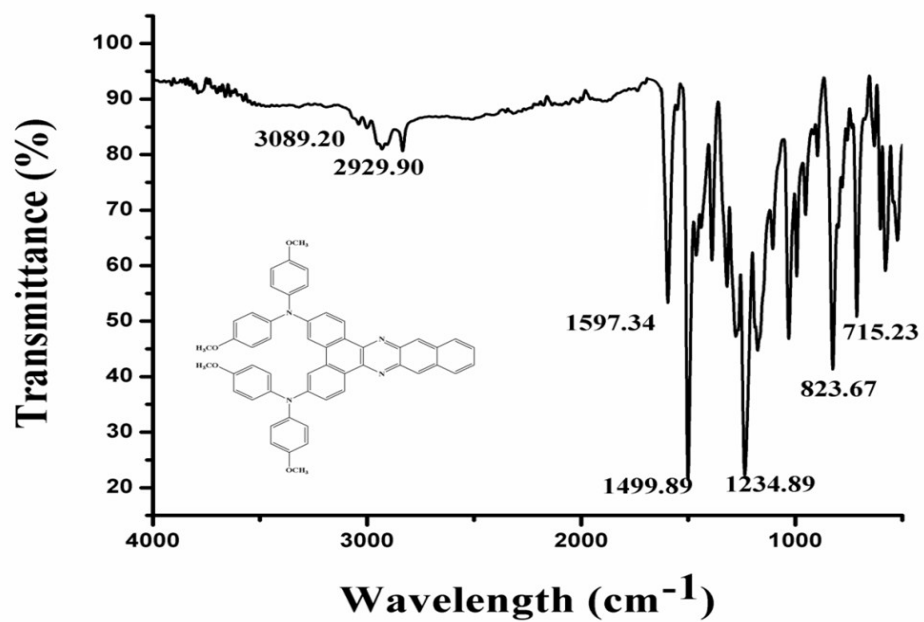

Fig. S9 FTIR Spectra of compound 4

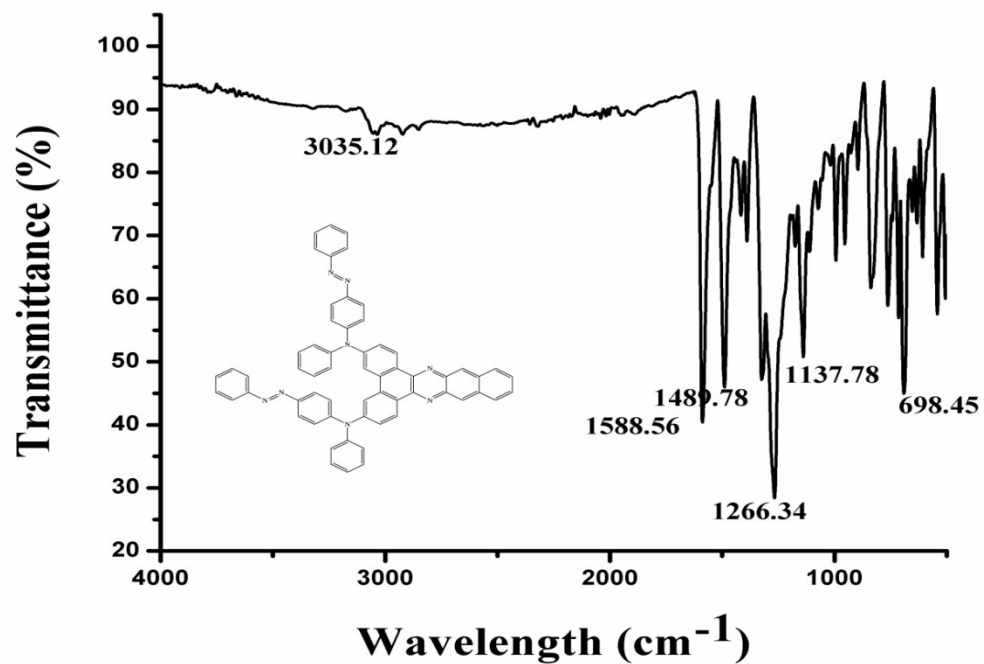

Fig. S10 FTIR Spectra of compound 5

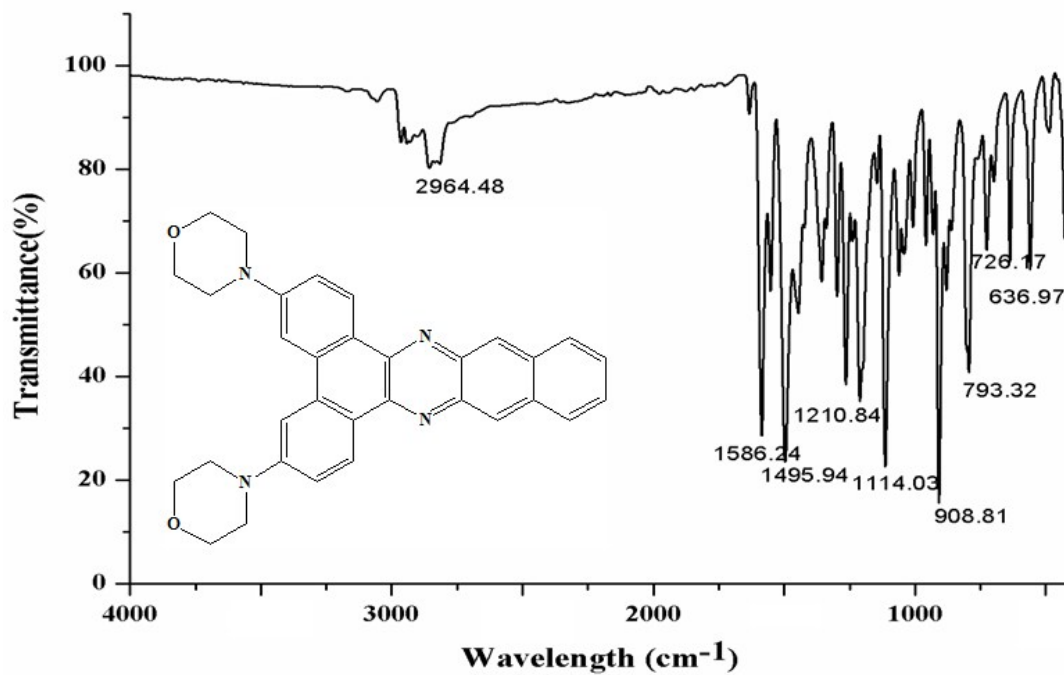

Fig. S11 FTIR Spectra of compound 6

#### 4. $^1\text{H}$ and $^{13}\text{C}$ NMR spectra of compounds 1 7

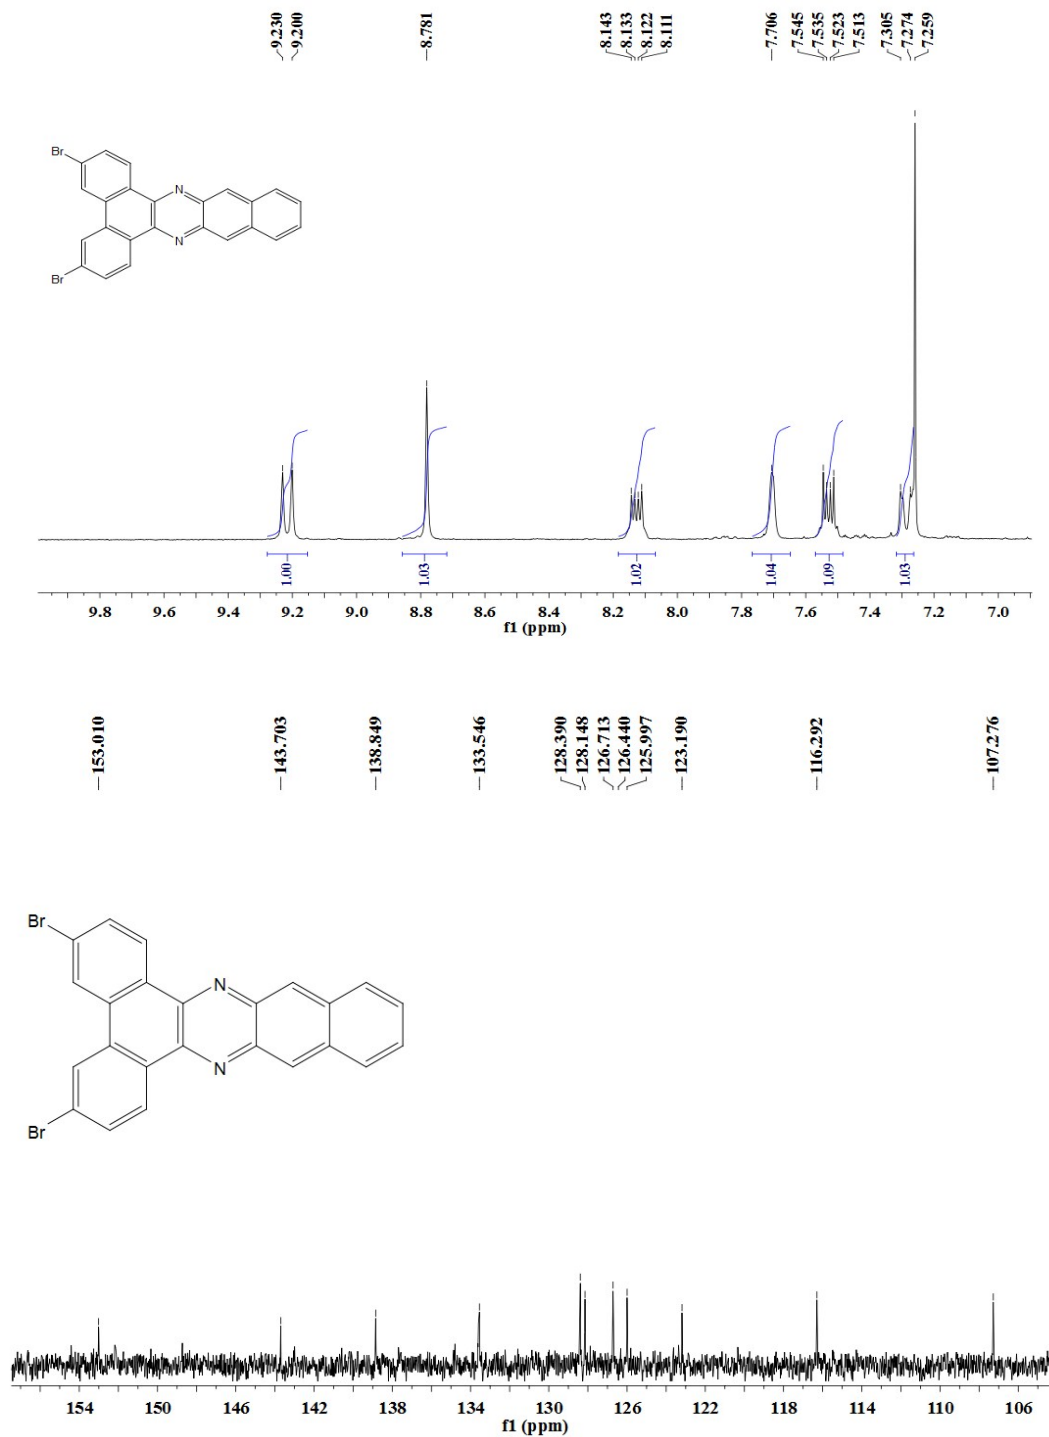

Fig. S12  $^1\text{H}$  and  $^{13}\text{C}$  NMR spectra of compound 1 in  $\text{CDCl}_3$

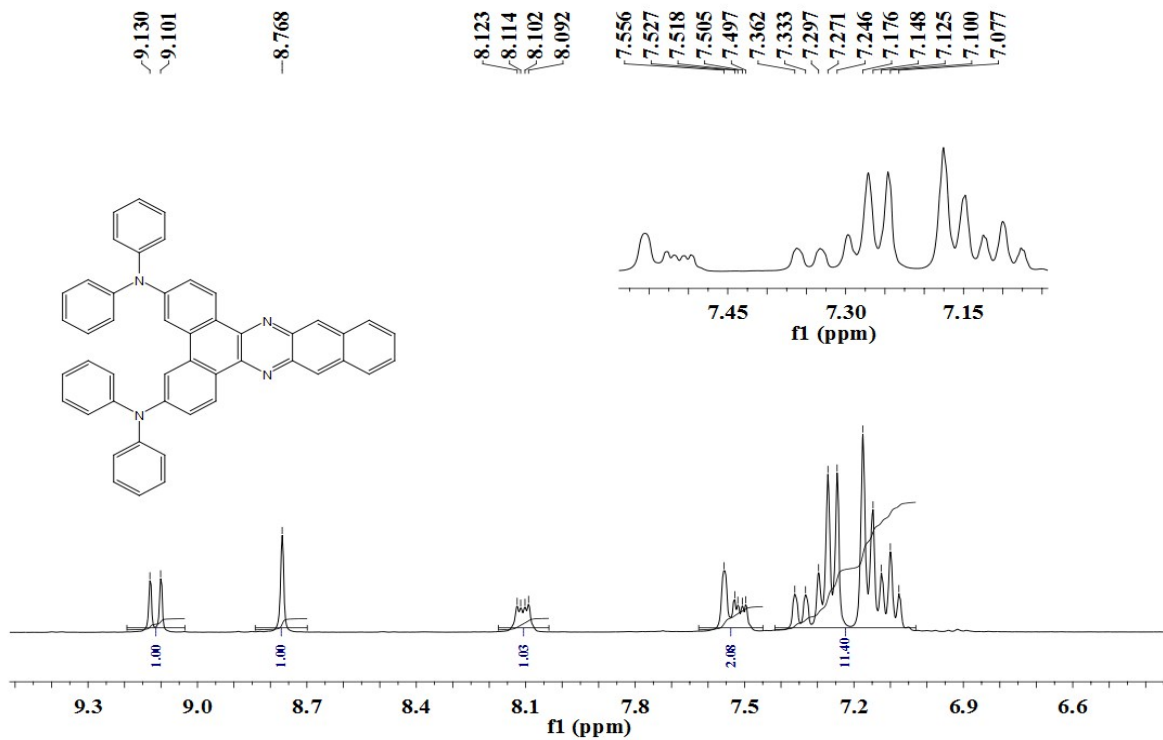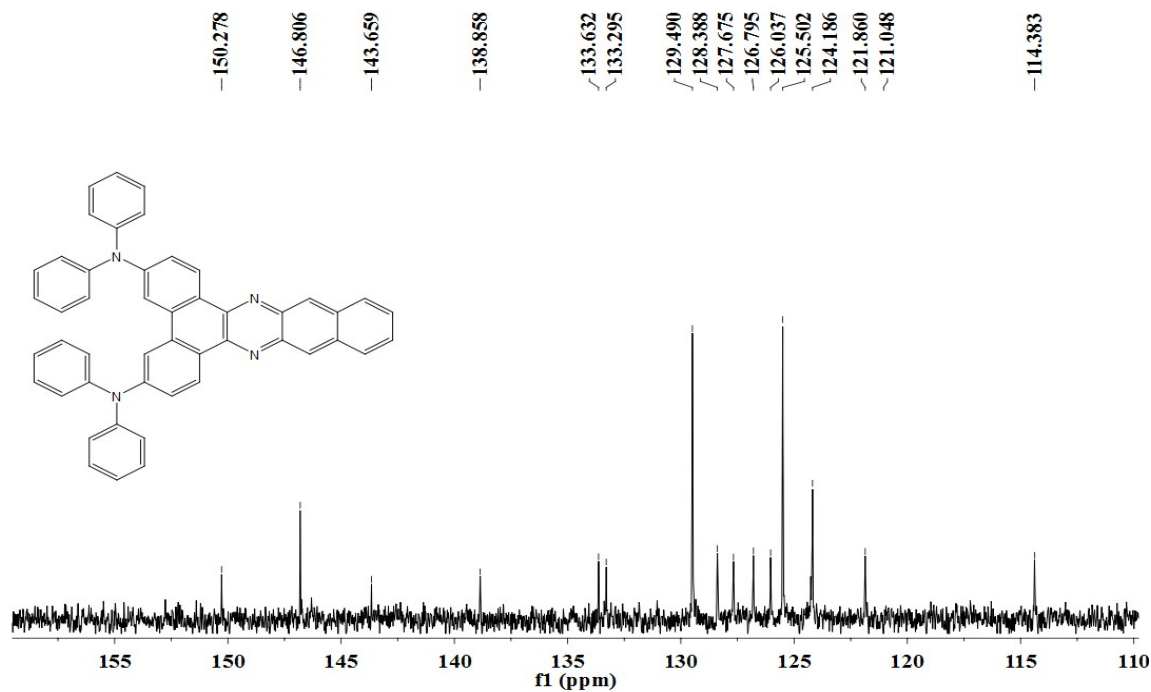

Fig. S13 <sup>1</sup>H and <sup>13</sup>C NMR spectra of compound 2 in CDCl<sub>3</sub>

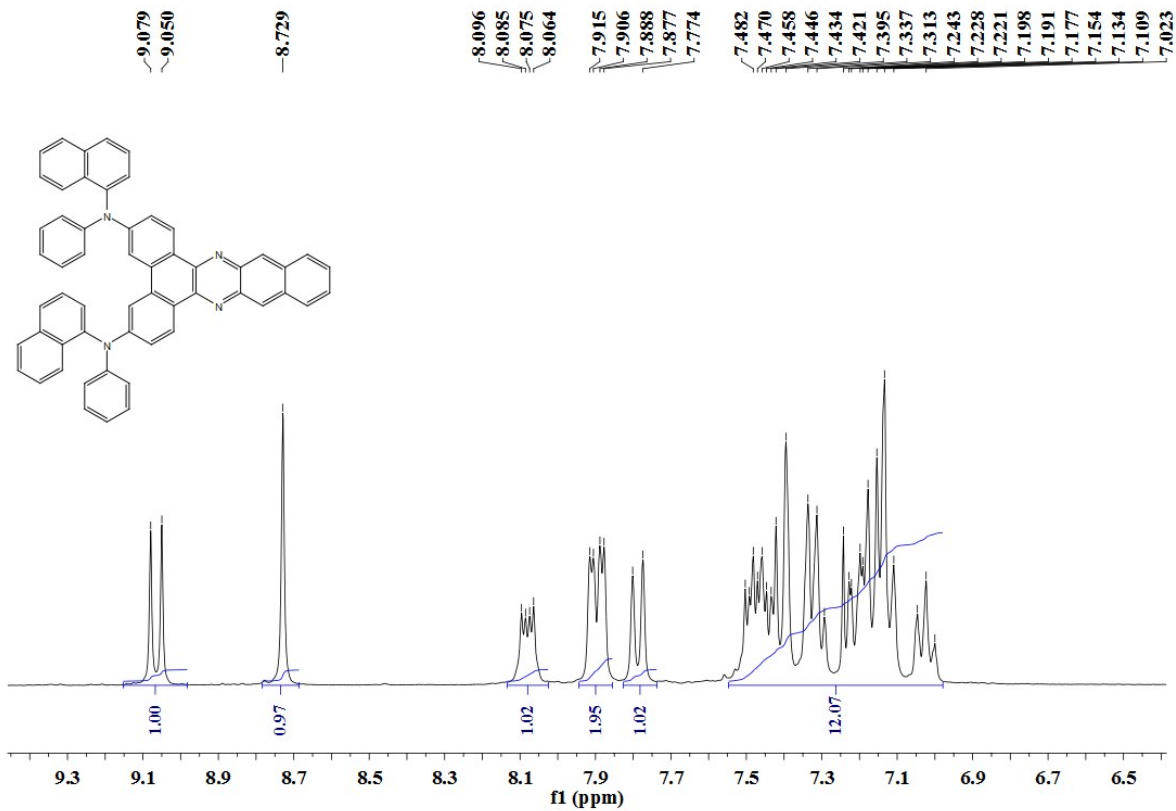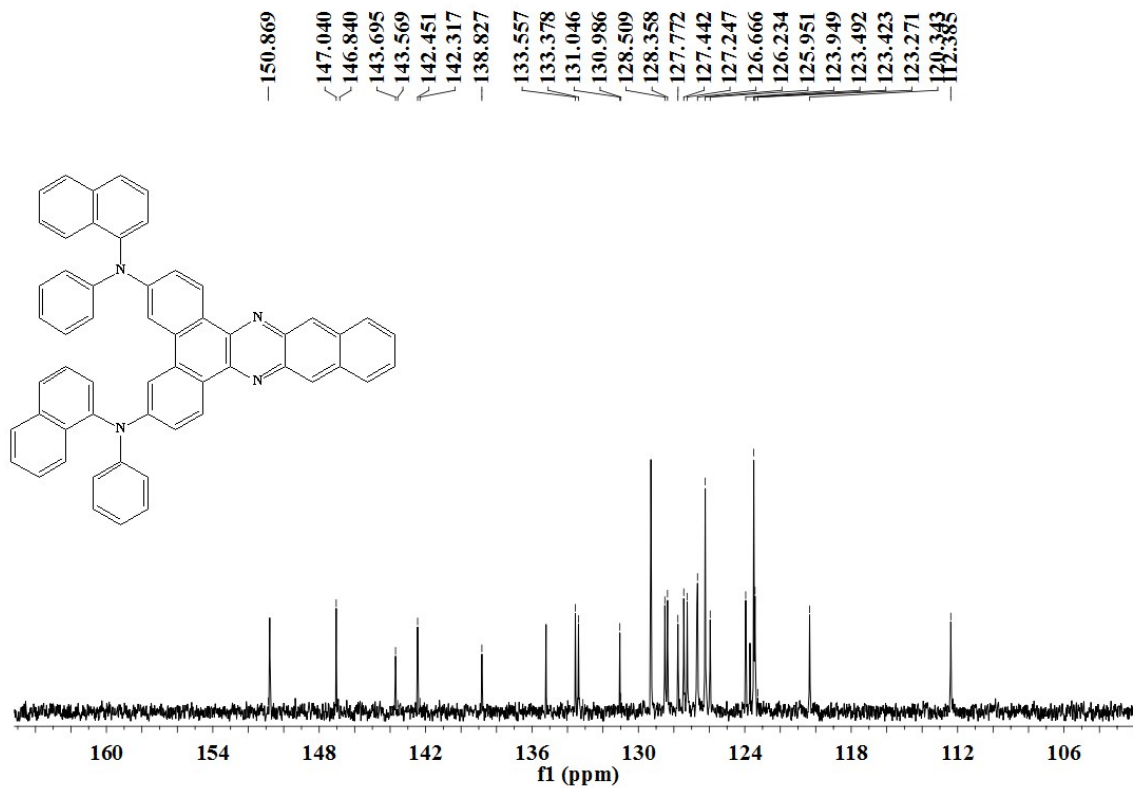

Fig. S14 <sup>1</sup>H and <sup>13</sup>C NMR spectra of compound 3 in CDCl<sub>3</sub>

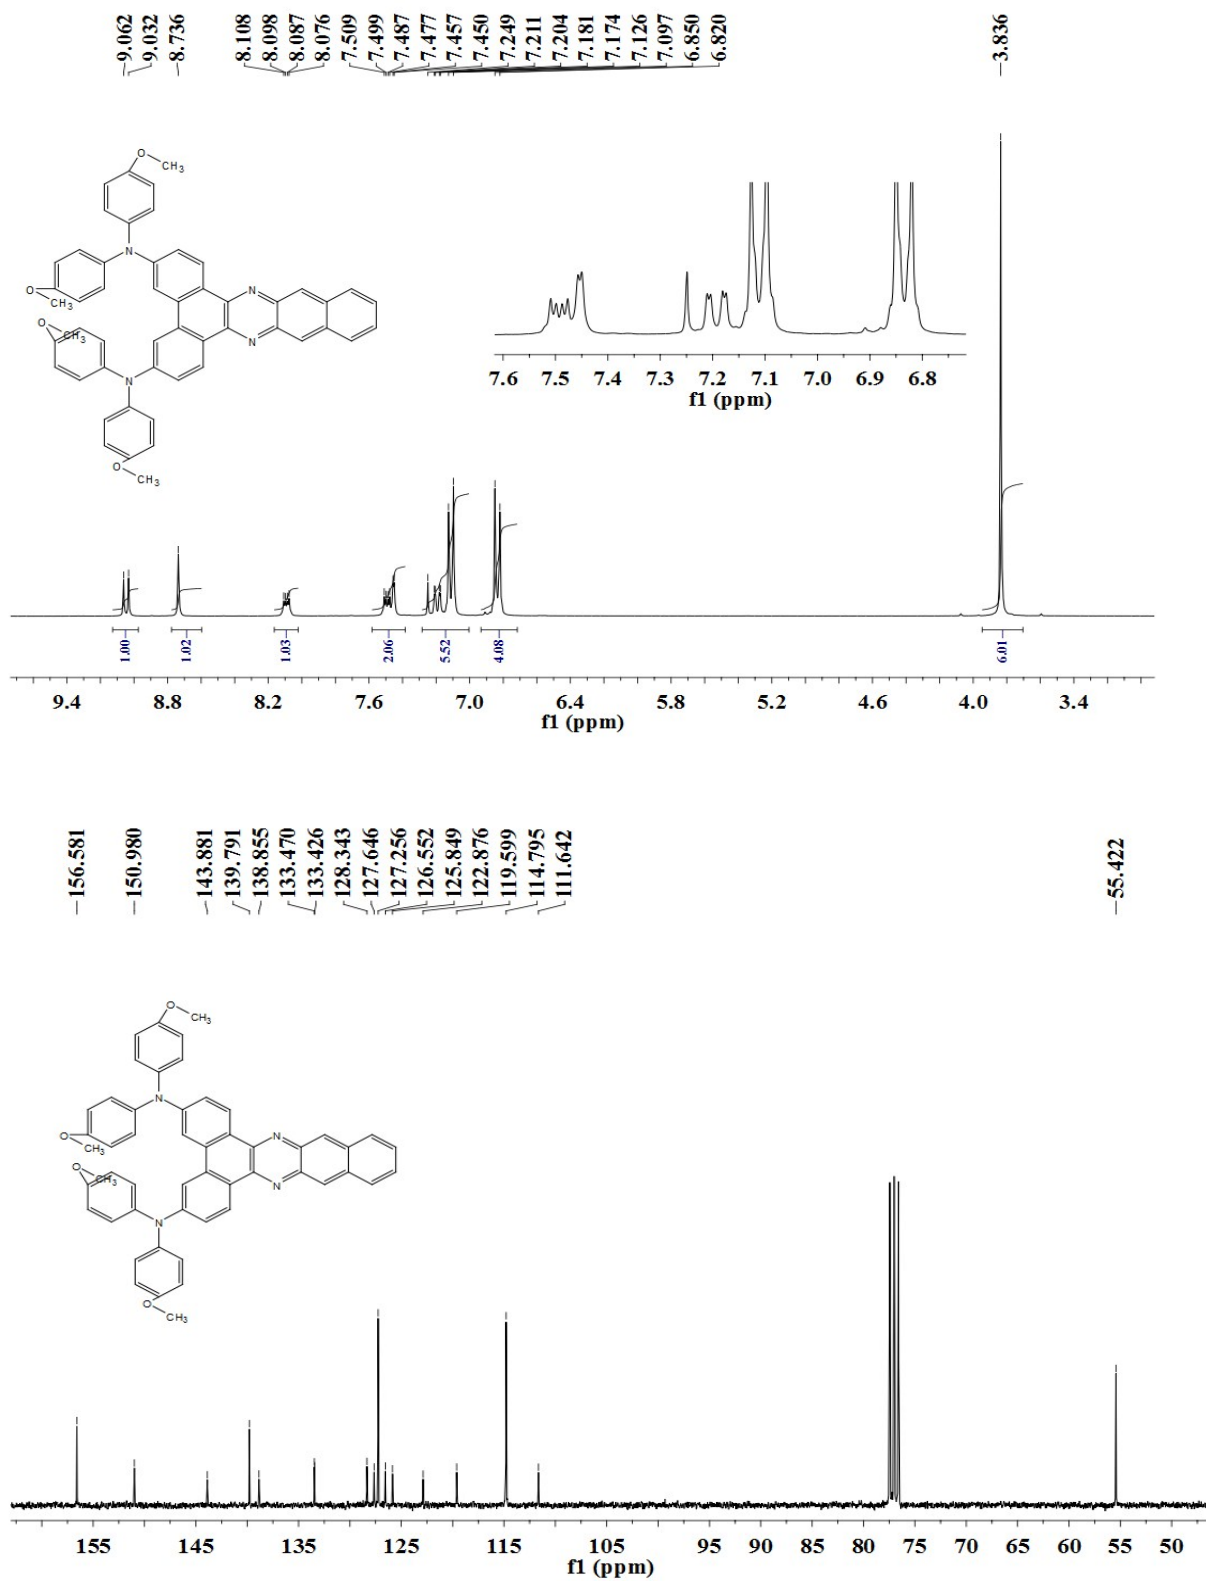

Fig. S15 <sup>1</sup>H and <sup>13</sup>C NMR spectra of compound 4 in CDCl<sub>3</sub>

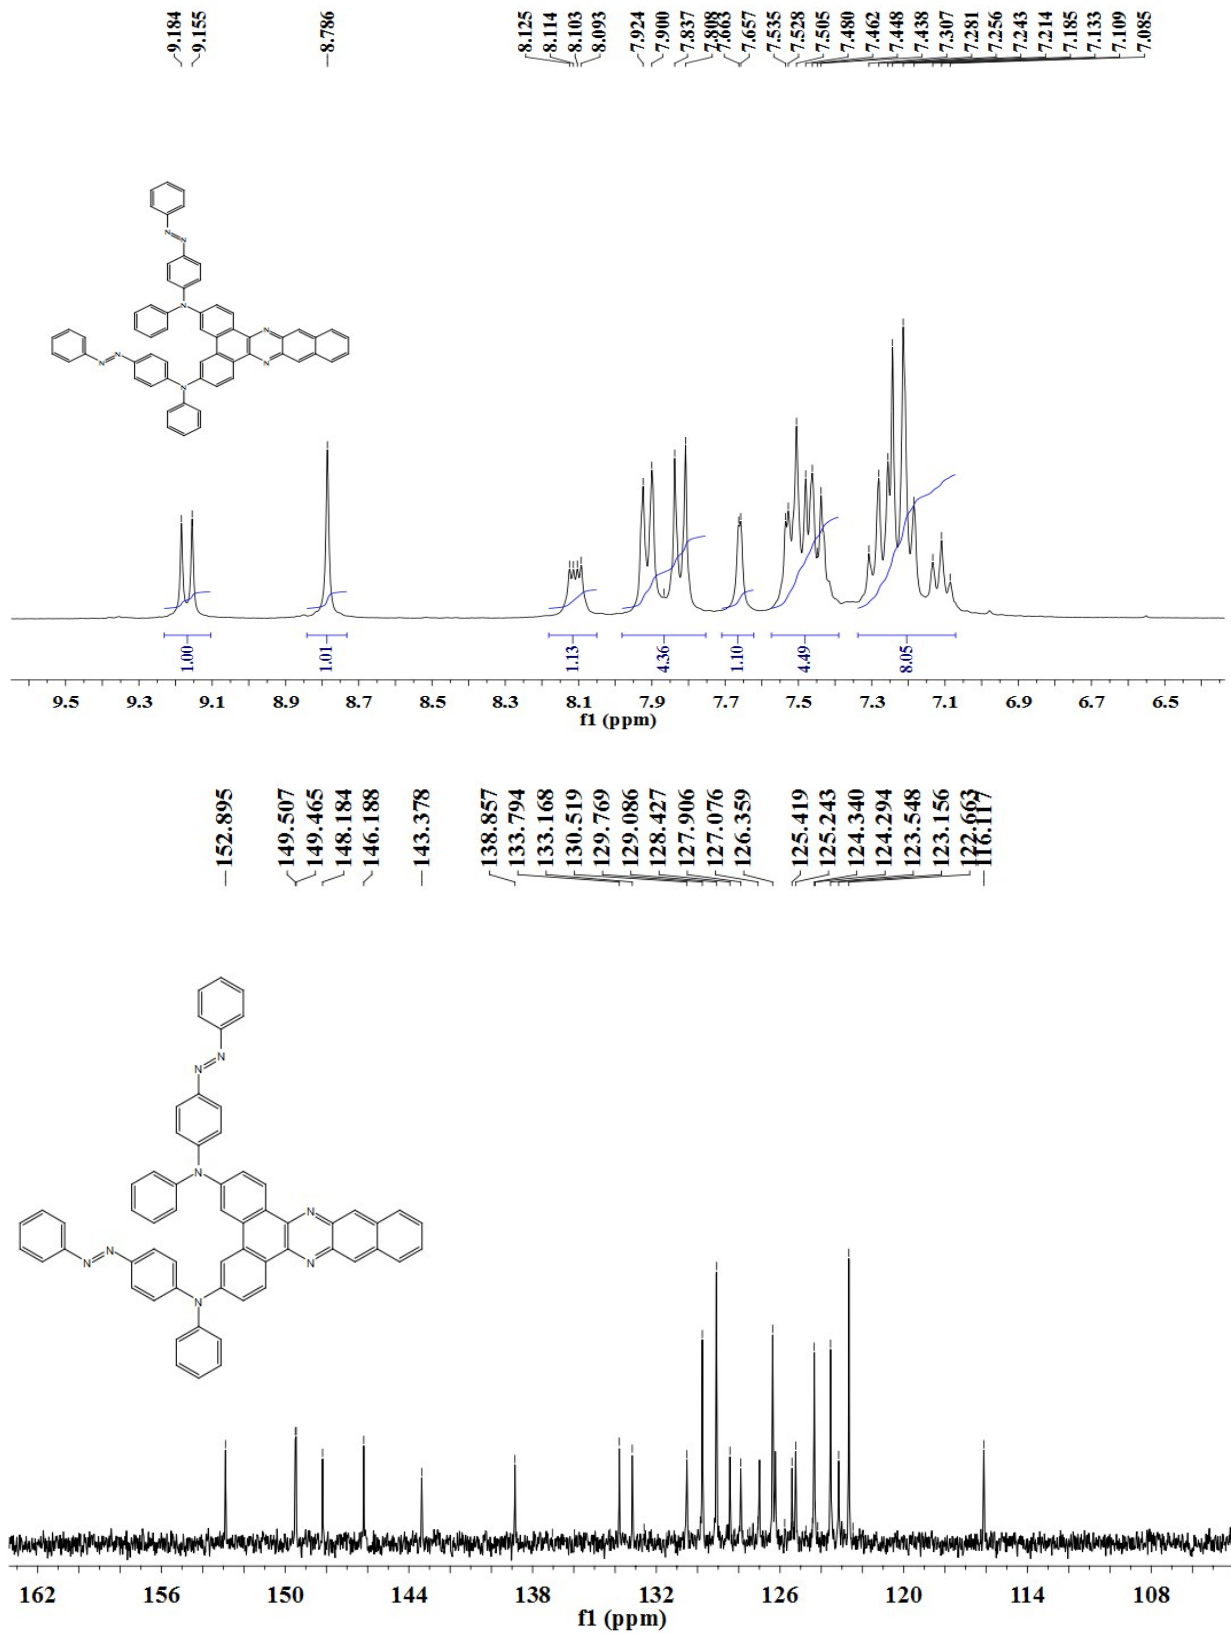

Fig. S16 <sup>1</sup>H and <sup>13</sup>C NMR spectra of compound 5 in CDCl<sub>3</sub>



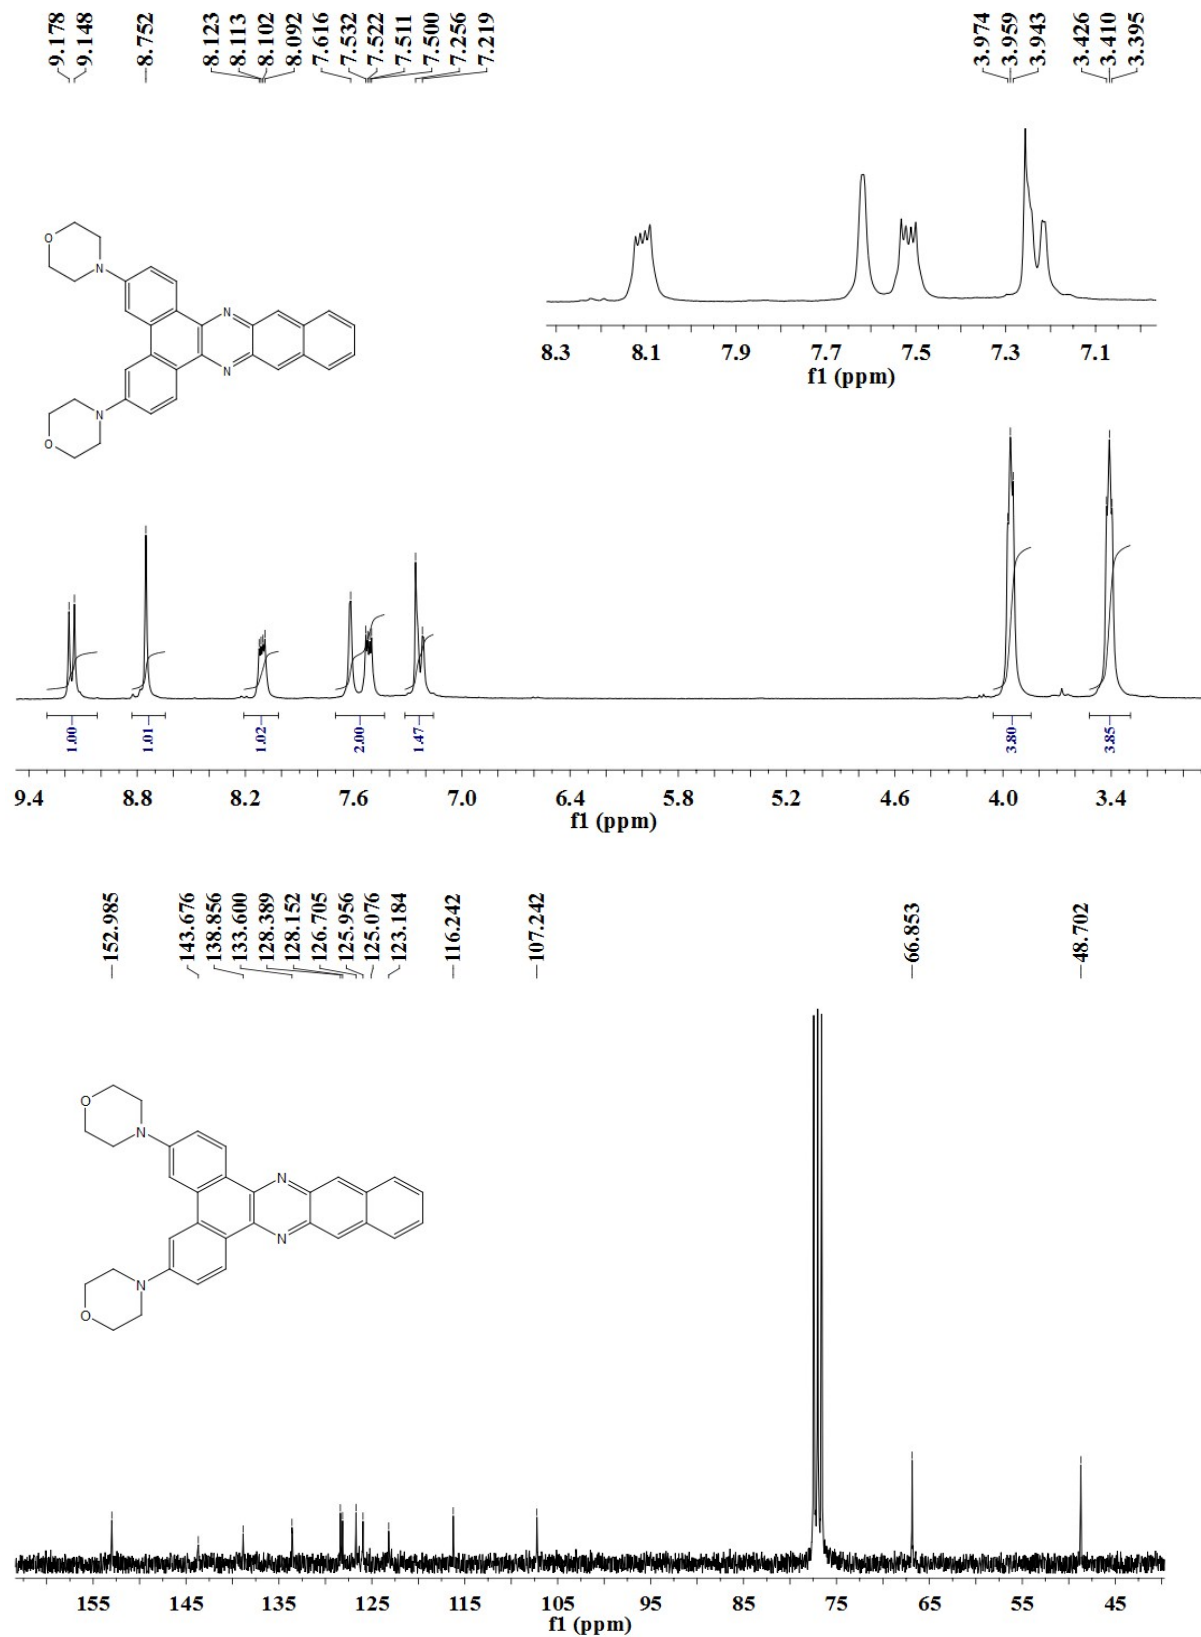

Fig. S17 <sup>1</sup>H and <sup>13</sup>C NMR spectra of compound 6 in CDCl<sub>3</sub>

## 5. Photophysical data of compounds 2-6 in various solvents

a. Photophysical data of compounds 2-6 in Cyclohexane.

| Compound | $\lambda_{\text{emi}}^{\text{a}}$<br>nm | Stokes<br>shift<br>$\text{cm}^{-1}$ | $E_g^{\text{opt}}$<br>(eV) | $\phi_{\text{F}}$ |
|----------|-----------------------------------------|-------------------------------------|----------------------------|-------------------|
| 2        | 515                                     | 11832                               | 2.48                       | 0.10              |
| 3        | 512                                     | 11816                               | 2.46                       | 0.07              |
| 4        | 550                                     | 12587                               | 2.34                       | 0.11              |
| 5        | —                                       | —                                   | —                          | —                 |
| 6        | 507                                     | 14883                               | 2.49                       | 0.21              |

<sup>a</sup>Recorded in  $10^{-5}$  M cyclohexane.

b. Photophysical data of compounds 2-6 in dichloromethane.

| Compound | $\lambda_{\text{emi}}^{\text{a}}$<br>nm | Stokes<br>shift<br>$\text{cm}^{-1}$ | $E_g^{\text{opt}}$<br>(eV) | $\phi_{\text{F}}$ |
|----------|-----------------------------------------|-------------------------------------|----------------------------|-------------------|
| 2        | 625                                     | 15055                               | 2.37                       | 0.17              |
| 3        | 613                                     | 14936                               | 2.39                       | 0.12              |
| 4        | —                                       | —                                   | —                          | —                 |
| 5        | —                                       | —                                   | —                          | —                 |
| 6        | 589                                     | 16025                               | 2.39                       | 0.20              |

<sup>a</sup>Recorded in  $10^{-5}$  M dichloromethane.

c. Photophysical data of compounds 2-6 in dimethyl sulfoxide.

| Compound | $\lambda_{\text{emi}}^{\text{a}}$<br>nm | Stokes<br>shift<br>$\text{cm}^{-1}$ | $E_g^{\text{opt}}$<br>(eV) | $\phi_{\text{F}}$ |
|----------|-----------------------------------------|-------------------------------------|----------------------------|-------------------|
| 2        | 552                                     | 12748                               | 2.38                       | 0.15              |
| 3        | 540                                     | 12634                               | 2.39                       | 0.13              |
| 4        | —                                       | —                                   | —                          | —                 |
| 5        | —                                       | —                                   | —                          | —                 |
| 6        | 538                                     | 13985                               | 2.42                       | 0.19              |

<sup>a</sup>Recorded in  $10^{-5}$  M dimethyl sulfoxide.

6. Absorption spectra of compound 1 in toluene

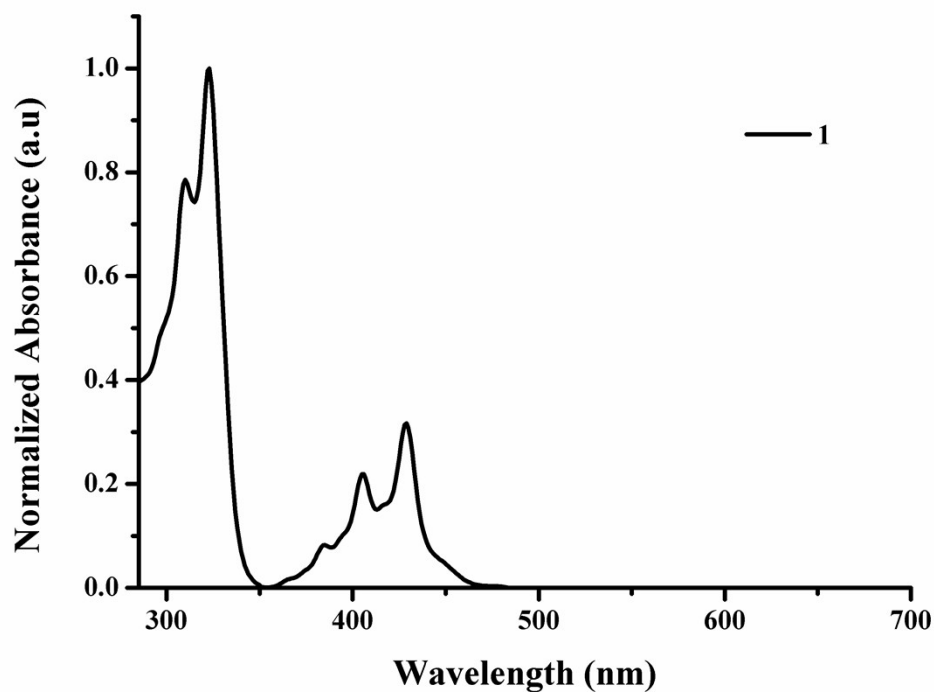

## 7. Absorption and Emission spectra of compound 2-6 in various solvents

### a. Absorption spectra of compound 2-6

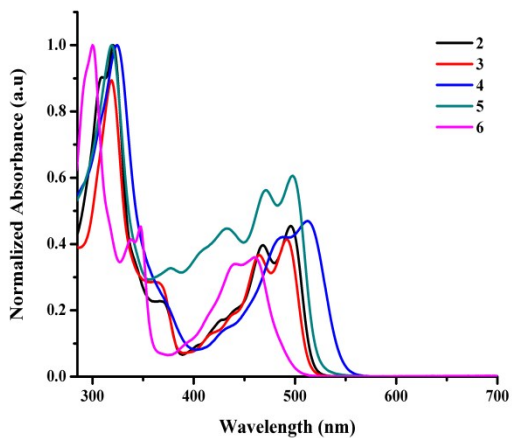

(a) Cyclohexane

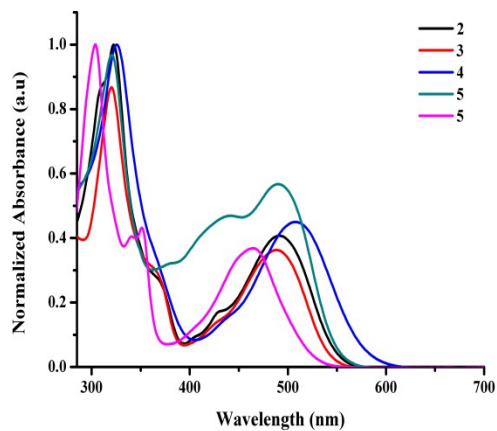

(b) Dichloromethane

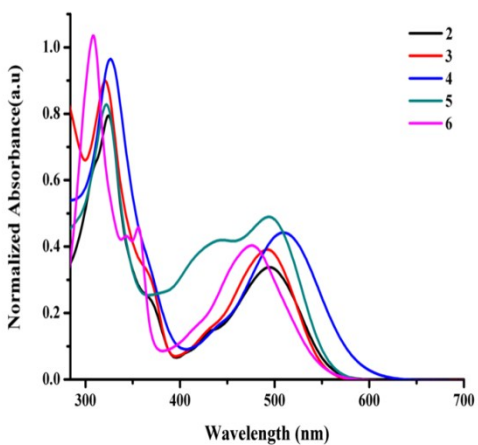

(c) dimethyl sulfoxide

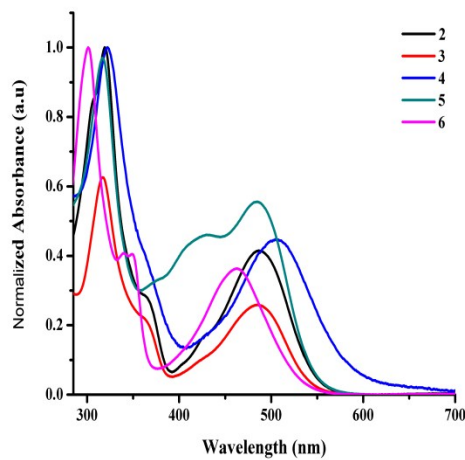

(d) methanol

## Fluorescence spectra of compound 2-6

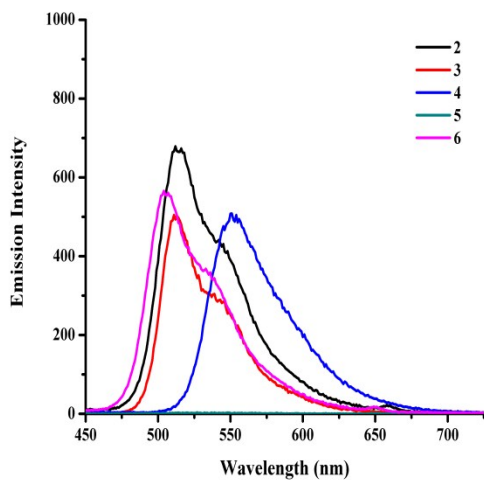

(a) Cyclohexane

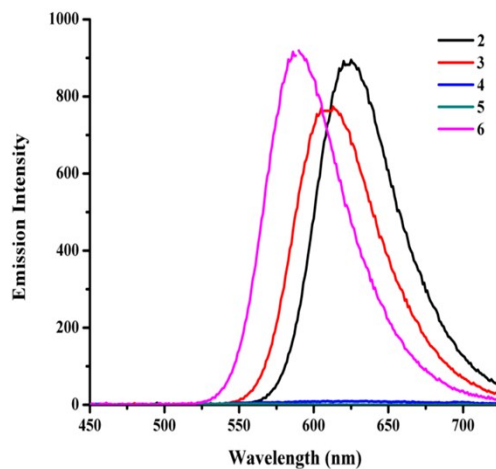

(b) Dichloromethane

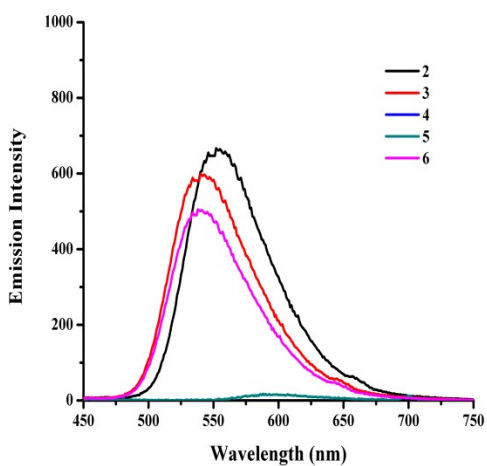

(c) Dimethyl sulfoxide

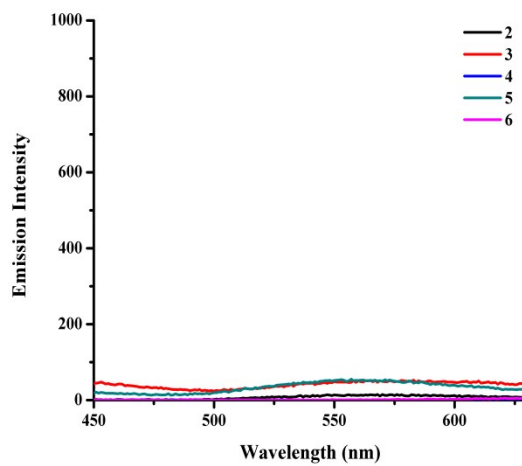

(d) Methanol

**8. Emission of compounds 2-6 under UV light (365 nm)**

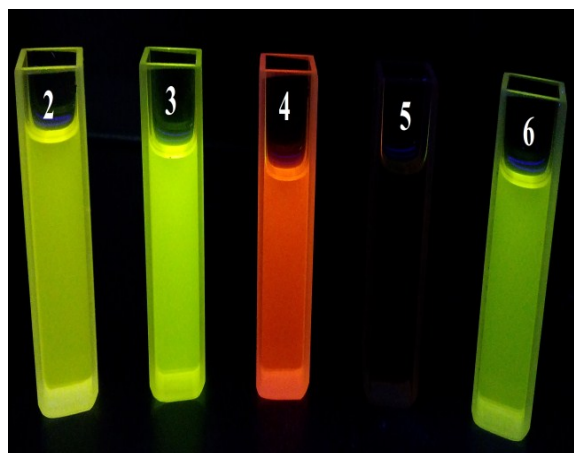

**Toluene**

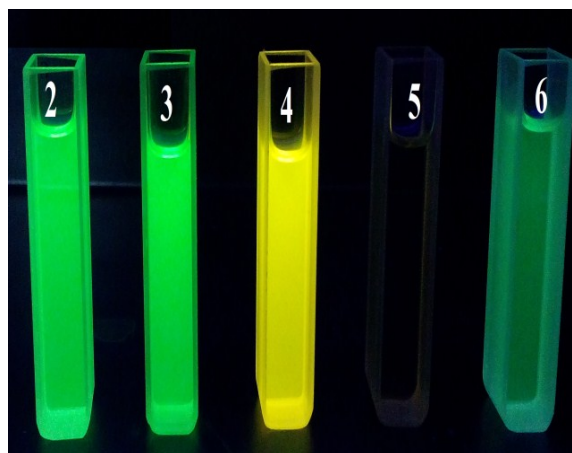

**Cyclohexane**

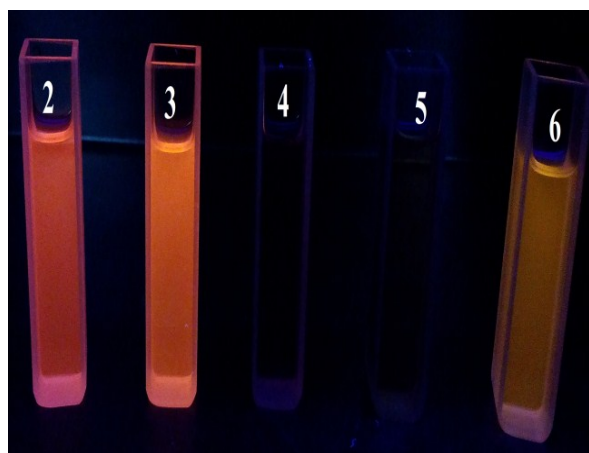

**Dichloromethane**

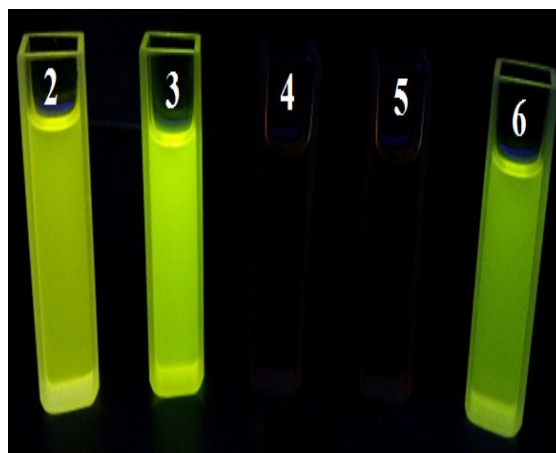

**Dimethyl sulfoxide**

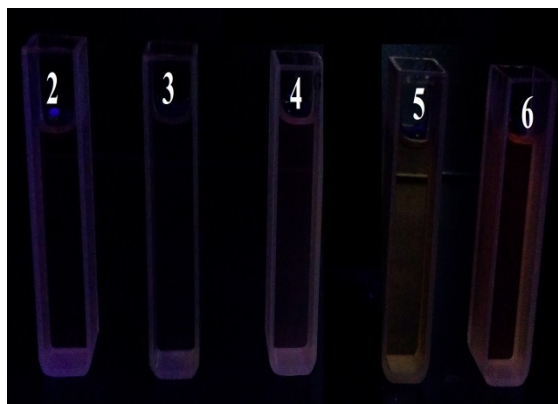

**Methanol**

## 9. Cyclic voltammogram of compounds 2–6

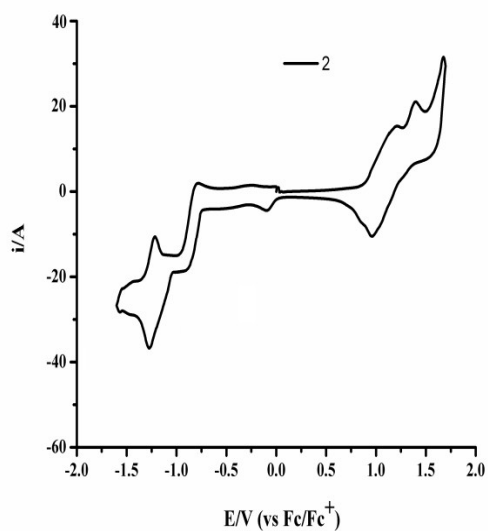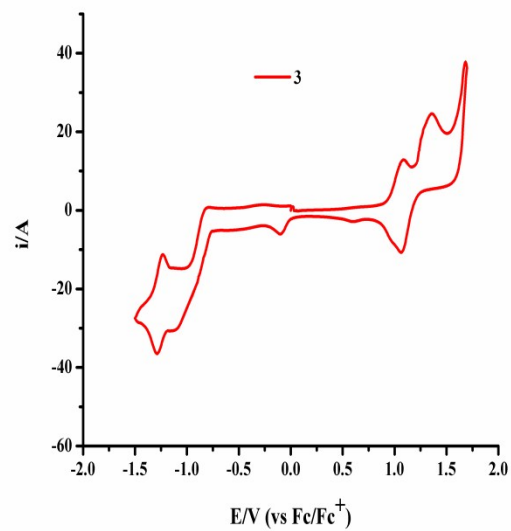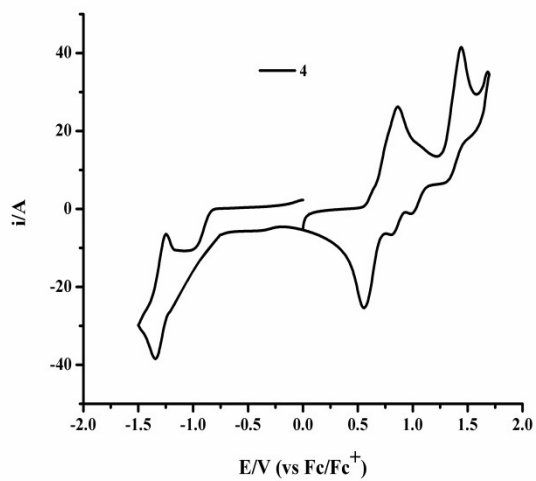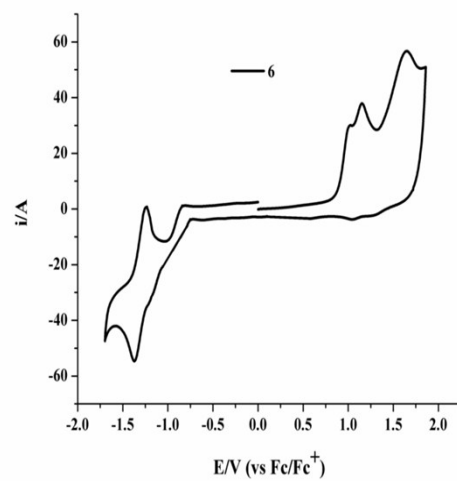

## 10. DSC Plots of compounds 2, 3, 5, 6.

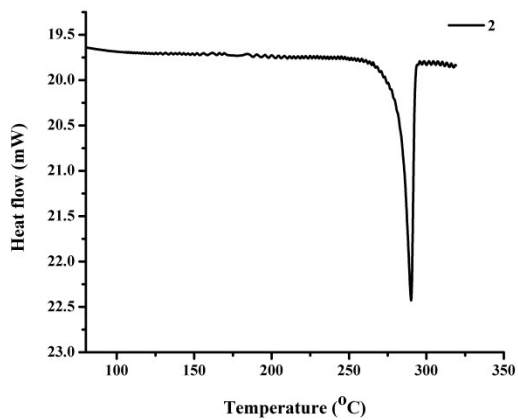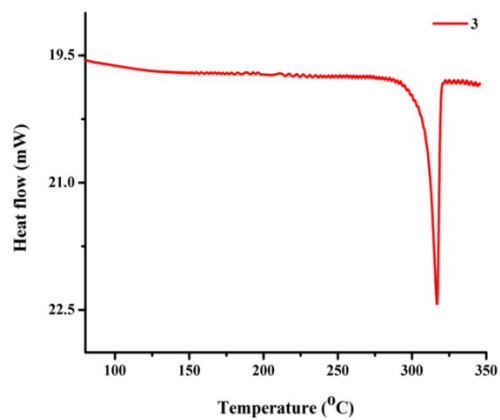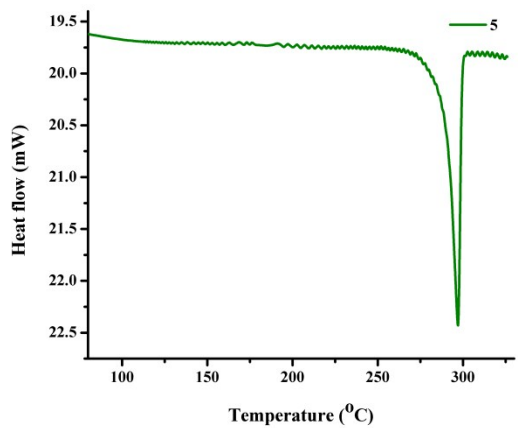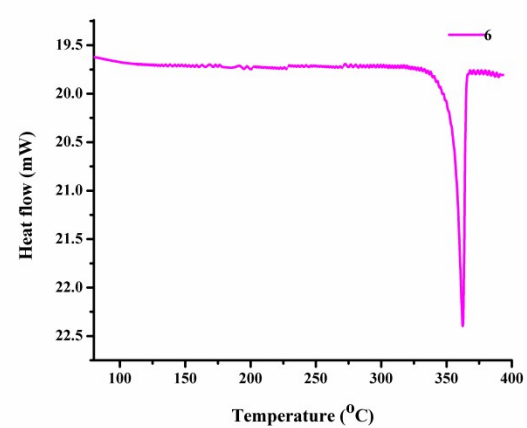



11. Optimized structures of compounds of 2 6

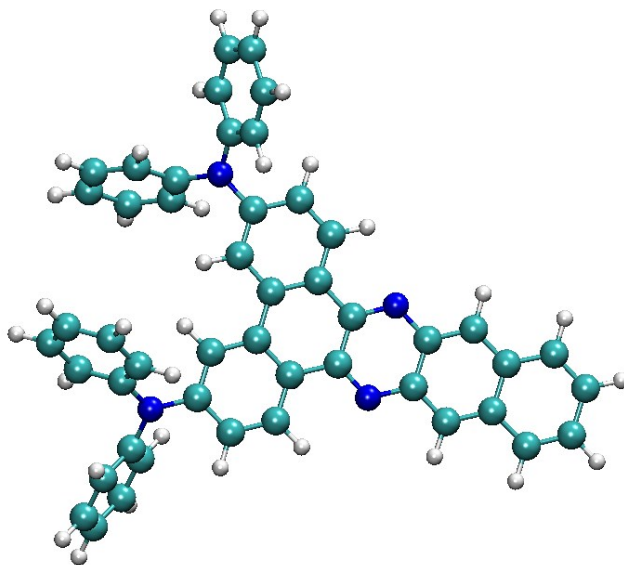

Fig. S18 Optimized structure of compound 2

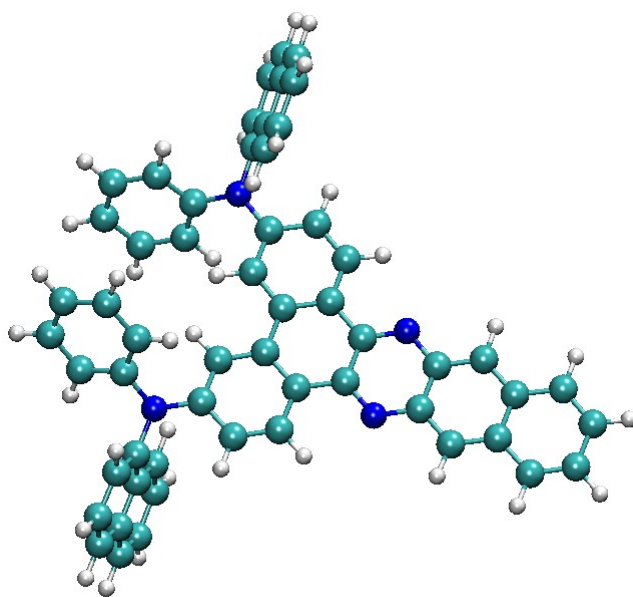

Fig. S19 Optimized structure of compound 3

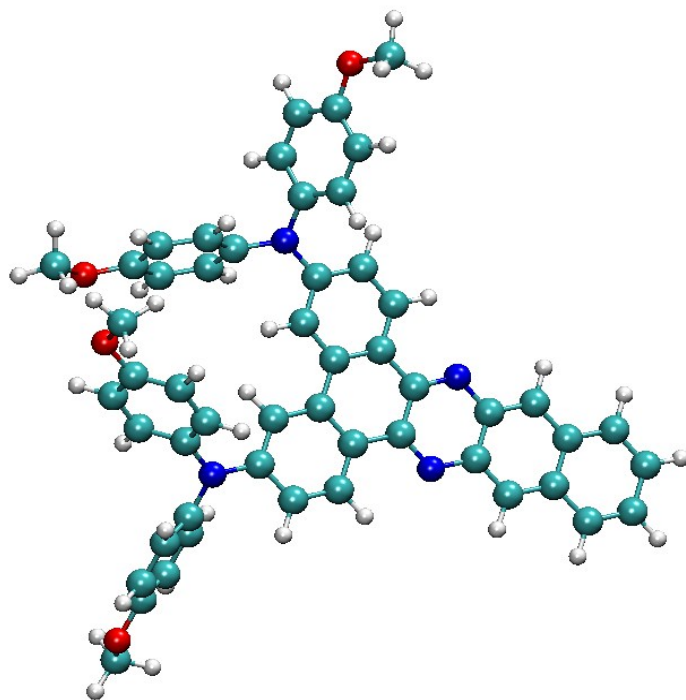

**Fig. S20** Optimized structure of compound 4

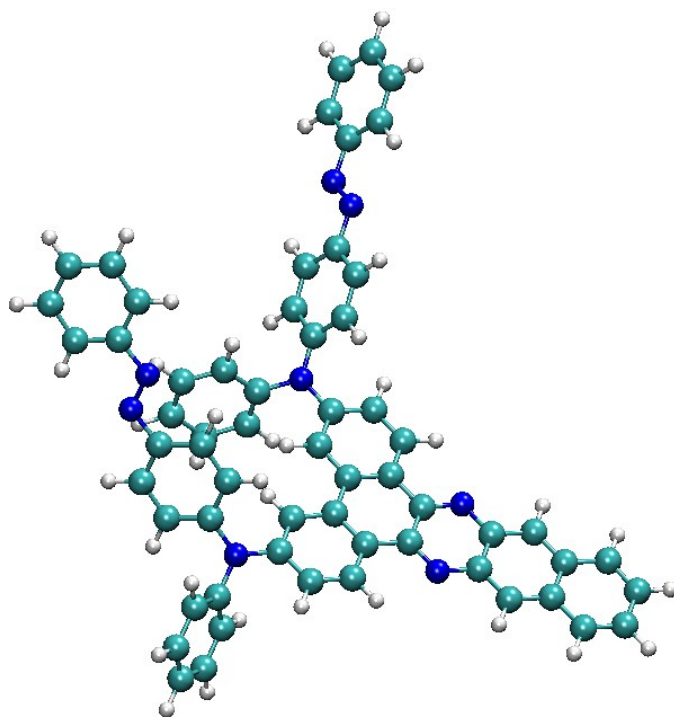

**Fig. S21** Optimized structure of compound 5

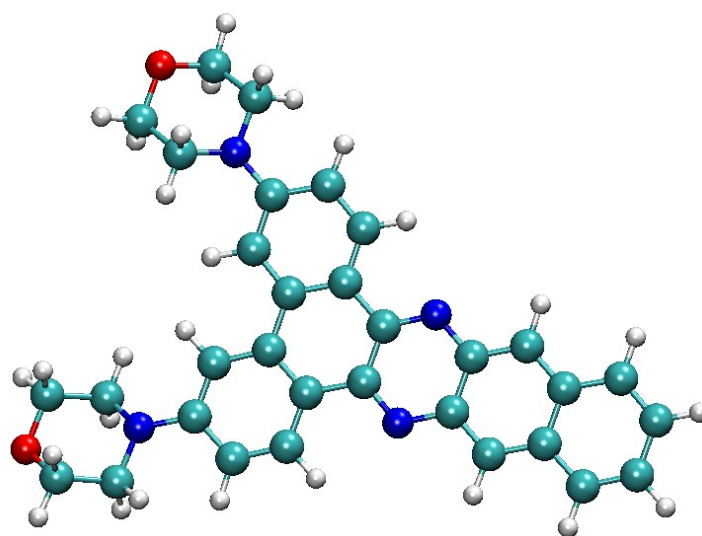

**Fig. S22** Optimized structure of compound **6**

## 12. Cartesian coordinates and Mulliken and Lowdin charges of compounds 2 6

**Table S1.** Cartesian coordinates and Mulliken and Lowdin charges of optimized structure of compound 2

Total energy: 2067.36384755 Hartrees

| Atom | Cartesian Coordinates |          |          | Mulliken charges | Lowdin charges |
|------|-----------------------|----------|----------|------------------|----------------|
|      | x                     | y        | z        |                  |                |
| C    | -1.86943              | 4.15878  | 3.408169 | 0.302431         | 0.071094       |
| C    | -1.91956              | 2.96258  | 2.685618 | -0.18615         | -0.09621       |
| C    | -2.99202              | 2.062106 | 2.812493 | 0.007546         | -0.00174       |
| C    | -4.05861              | 2.400816 | 3.686471 | -0.04266         | -0.05447       |
| C    | -4.00655              | 3.615014 | 4.399622 | -0.08397         | -0.04084       |
| C    | -2.93681              | 4.48052  | 4.27452  | -0.13368         | -0.09487       |
| C    | -3.03836              | 0.793579 | 2.053196 | 0.008095         | -0.00159       |
| C    | -4.13849              | -0.08844 | 2.219388 | -0.04351         | -0.05494       |
| C    | -5.2309               | 0.250448 | 3.122752 | 0.064857         | 0.031062       |
| C    | -5.19454              | 1.502619 | 3.853176 | 0.064811         | 0.030998       |
| C    | -2.0081               | 0.419893 | 1.17224  | -0.18661         | -0.0969        |
| C    | -2.05185              | -0.77648 | 0.449034 | 0.30603          | 0.071692       |
| C    | -3.15438              | -1.64136 | 0.623191 | -0.13577         | -0.09554       |
| C    | -4.16827              | -1.29741 | 1.496325 | -0.08341         | -0.04064       |
| N    | -6.24855              | -0.59807 | 3.262038 | -0.3738          | -0.11413       |
| C    | -7.27669              | -0.26257 | 4.11301  | 0.113334         | 0.006586       |
| C    | -7.24466              | 0.985444 | 4.8325   | 0.113169         | 0.006536       |
| N    | -6.18244              | 1.84685  | 4.678177 | -0.37369         | -0.11402       |
| C    | -8.35852              | -1.13204 | 4.281447 | -0.11993         | -0.06505       |
| C    | -9.41692              | -0.80687 | 5.140699 | -0.00215         | -0.02016       |
| C    | -9.38601              | 0.452165 | 5.863789 | -0.00211         | -0.0202        |
| C    | -8.29743              | 1.317819 | 5.690399 | -0.11983         | -0.06501       |
| C    | -10.5378              | -1.67812 | 5.33312  | -0.13093         | -0.0662        |
| C    | -11.5609              | -1.33676 | 6.178595 | -0.15214         | -0.07925       |
| C    | -11.5308              | -0.09828 | 6.889268 | -0.15216         | -0.07927       |
| C    | -10.4783              | 0.765996 | 6.736109 | -0.13096         | -0.06621       |
| N    | -0.75512              | 5.033608 | 3.279952 | -0.96833         | -0.13351       |
| N    | -1.00795              | -1.11385 | -0.4556  | -0.9681          | -0.13356       |
| C    | -0.943                | 6.452743 | 3.309792 | 0.216049         | 0.055922       |
| C    | 0.56637               | 4.502889 | 3.11768  | 0.208691         | 0.054636       |

|   |          |          |          |          |          |
|---|----------|----------|----------|----------|----------|
| C | -0.59954 | -2.47798 | -0.61193 | 0.211014 | 0.055345 |
| C | -0.35679 | -0.09591 | -1.22628 | 0.209315 | 0.054694 |
| C | 1.435061 | 5.043689 | 2.156595 | -0.11589 | -0.09061 |
| C | 2.726814 | 4.535559 | 2.012862 | -0.15948 | -0.07258 |
| C | 3.164447 | 3.4747   | 2.810999 | -0.13118 | -0.08942 |
| C | 2.298409 | 2.93052  | 3.76444  | -0.16231 | -0.07341 |
| C | 1.011263 | 3.443712 | 3.925774 | -0.11597 | -0.09142 |
| C | -0.06601 | 7.26886  | 4.04288  | -0.12101 | -0.09226 |
| C | -0.24429 | 8.652434 | 4.061038 | -0.16188 | -0.07318 |
| C | -1.30434 | 9.240818 | 3.364525 | -0.13205 | -0.09075 |
| C | -2.18216 | 8.429548 | 2.639496 | -0.16153 | -0.07313 |
| C | -2.00088 | 7.046621 | 2.601882 | -0.11989 | -0.09333 |
| C | -0.37435 | -3.0068  | -1.89314 | -0.11887 | -0.09137 |
| C | 0.033633 | -4.33244 | -2.04383 | -0.16191 | -0.07323 |
| C | 0.208366 | -5.15214 | -0.9247  | -0.13181 | -0.0901  |
| C | -0.02063 | -4.62891 | 0.351413 | -0.16205 | -0.07327 |
| C | -0.41301 | -3.29951 | 0.511703 | -0.11644 | -0.09236 |
| C | 1.04153  | -0.08742 | -1.35021 | -0.11619 | -0.09048 |
| C | 1.672345 | 0.892289 | -2.11811 | -0.15926 | -0.07252 |
| C | 0.922652 | 1.883239 | -2.75827 | -0.13126 | -0.0894  |
| C | -0.46985 | 1.880739 | -2.6299  | -0.16236 | -0.0734  |
| C | -1.10926 | 0.895025 | -1.87766 | -0.11629 | -0.09164 |
| H | -1.10356 | 2.745071 | 2.015717 | 0.215248 | 0.08932  |
| H | -4.82565 | 3.842697 | 5.065074 | 0.179206 | 0.094732 |
| H | -2.9068  | 5.397653 | 4.84399  | 0.179065 | 0.091008 |
| H | -1.14969 | 1.057858 | 1.038543 | 0.216149 | 0.089239 |
| H | -3.205   | -2.56381 | 0.063964 | 0.179466 | 0.090995 |
| H | -5.02178 | -1.94405 | 1.633642 | 0.17912  | 0.094714 |
| H | -8.35616 | -2.06212 | 3.729304 | 0.167478 | 0.08987  |
| H | -8.24774 | 2.261124 | 6.217305 | 0.167461 | 0.08987  |
| H | -10.5591 | -2.6164  | 4.793326 | 0.157475 | 0.084296 |
| H | -12.4009 | -2.00482 | 6.314097 | 0.149266 | 0.083196 |
| H | -12.3487 | 0.152242 | 7.551645 | 0.14925  | 0.083191 |
| H | -10.4539 | 1.705028 | 7.274492 | 0.157501 | 0.084306 |
| H | 1.094438 | 5.856161 | 1.530673 | 0.174885 | 0.089551 |
| H | 3.385841 | 4.961284 | 1.267782 | 0.150461 | 0.082683 |
| H | 4.163787 | 3.078706 | 2.692576 | 0.150736 | 0.081561 |
| H | 2.628166 | 2.11414  | 4.393324 | 0.151989 | 0.083324 |
| H | 0.348884 | 3.030979 | 4.67334  | 0.176523 | 0.089944 |
| H | 0.746127 | 6.815767 | 4.593365 | 0.176352 | 0.089587 |
| H | 0.438578 | 9.268926 | 4.630641 | 0.150848 | 0.082857 |

|   |          |          |          |          |          |
|---|----------|----------|----------|----------|----------|
| H | -1.44365 | 10.31301 | 3.386285 | 0.151268 | 0.081727 |
| H | -3.00226 | 8.873087 | 2.090421 | 0.151674 | 0.083228 |
| H | -2.67212 | 6.424346 | 2.02737  | 0.178164 | 0.089724 |
| H | -0.52156 | -2.37823 | -2.75982 | 0.175827 | 0.089648 |
| H | 0.202652 | -4.72741 | -3.03688 | 0.151163 | 0.082979 |
| H | 0.518348 | -6.1812  | -1.04488 | 0.151437 | 0.081837 |
| H | 0.11858  | -5.25135 | 1.225453 | 0.151918 | 0.08332  |
| H | -0.57523 | -2.89345 | 1.500024 | 0.177552 | 0.089777 |
| H | 1.623471 | -0.84558 | -0.84579 | 0.174659 | 0.089539 |
| H | 2.750856 | 0.887494 | -2.20471 | 0.150484 | 0.082692 |
| H | 1.4148   | 2.644866 | -3.34759 | 0.150778 | 0.081577 |
| H | -1.06167 | 2.638312 | -3.12648 | 0.15206  | 0.083348 |
| H | -2.18659 | 0.886255 | -1.79277 | 0.176674 | 0.089927 |

**Table S2.** Cartesian coordinates and Mulliken and Lowdin charges of optimized structure of compound **3**

Total energy: 2374.63457150 Hartrees

| Atom | Cartesian Coordinates |          |          | Mulliken charges | Lowdin charges |
|------|-----------------------|----------|----------|------------------|----------------|
|      | x                     | y        | z        |                  |                |
| C    | -0.36366              | 6.628363 | -3.04239 | 0.328925         | 0.073846       |
| C    | 0.620423              | 5.646487 | -2.86856 | -0.19607         | -0.10487       |
| C    | 1.736469              | 5.554005 | -3.71712 | 0.006329         | -0.00076       |
| C    | 1.873438              | 6.504779 | -4.76336 | -0.04303         | -0.05805       |
| C    | 0.888243              | 7.498312 | -4.92076 | -0.08167         | -0.03655       |
| C    | -0.21231              | 7.565393 | -4.08757 | -0.14226         | -0.10101       |
| C    | 2.768108              | 4.508486 | -3.53529 | 0.005978         | -0.00075       |
| C    | 3.878753              | 4.452574 | -4.41893 | -0.04205         | -0.05805       |
| C    | 4.020087              | 5.423003 | -5.49705 | 0.065713         | 0.031665       |
| C    | 3.016384              | 6.45674  | -5.6662  | 0.065653         | 0.031623       |
| C    | 2.674231              | 3.547807 | -2.51428 | -0.19597         | -0.10498       |
| C    | 3.651695              | 2.560705 | -2.33314 | 0.329564         | 0.073969       |
| C    | 4.748229              | 2.518032 | -3.22138 | -0.14226         | -0.1011        |
| C    | 4.847191              | 3.446126 | -4.24077 | -0.082           | -0.03652       |
| N    | 5.071261              | 5.345083 | -6.31167 | -0.3741          | -0.11528       |
| C    | 5.19511               | 6.272418 | -7.32146 | 0.113219         | 0.006388       |
| C    | 4.203271              | 7.304644 | -7.48352 | 0.113029         | 0.006379       |
| N    | 3.121396              | 7.365411 | -6.63462 | -0.37413         | -0.11523       |

|   |          |          |          |          |          |
|---|----------|----------|----------|----------|----------|
| C | 6.286436 | 6.217194 | -8.19343 | -0.12025 | -0.06563 |
| C | 6.432705 | 7.154852 | -9.2251  | -0.00214 | -0.02065 |
| C | 5.434759 | 8.197322 | -9.38627 | -0.00222 | -0.02066 |
| C | 4.34274  | 8.244742 | -8.50877 | -0.12028 | -0.06557 |
| C | 7.539947 | 7.12287  | -10.1335 | -0.13135 | -0.06645 |
| C | 7.660785 | 8.052224 | -11.1335 | -0.15258 | -0.08013 |
| C | 6.67976  | 9.077948 | -11.2915 | -0.15263 | -0.08014 |
| C | 5.603674 | 9.146835 | -10.4456 | -0.1312  | -0.06645 |
| N | -1.48012 | 6.700889 | -2.17031 | -0.97053 | -0.13554 |
| N | 3.531926 | 1.601597 | -1.29501 | -0.97009 | -0.13584 |
| C | 4.176698 | 0.318038 | -1.42113 | 0.114244 | 0.05609  |
| C | 2.906034 | 1.9189   | -0.04506 | 0.216397 | 0.058328 |
| C | -2.04695 | 5.526862 | -1.57405 | 0.215705 | 0.05815  |
| C | -2.17121 | 7.952806 | -1.9876  | 0.116564 | 0.056109 |
| C | -3.48055 | 8.073979 | -2.4143  | -0.09963 | -0.08128 |
| C | -4.19141 | 9.284063 | -2.24436 | -0.15949 | -0.07872 |
| C | -3.58119 | 10.37198 | -1.66152 | -0.10259 | -0.06982 |
| C | -2.23828 | 10.2892  | -1.20034 | -0.04066 | -0.02223 |
| C | -1.51474 | 9.055351 | -1.34668 | 0.019635 | -0.03005 |
| C | -2.49039 | 5.56648  | -0.24245 | -0.11934 | -0.0912  |
| C | -3.07308 | 4.439777 | 0.338455 | -0.15786 | -0.07167 |
| C | -3.21115 | 3.256377 | -0.39231 | -0.12884 | -0.08977 |
| C | -2.76877 | 3.213947 | -1.71787 | -0.16352 | -0.07325 |
| C | -2.19888 | 4.340812 | -2.31148 | -0.12536 | -0.09672 |
| C | 5.204343 | -0.01314 | -0.55796 | -0.09942 | -0.08092 |
| C | 5.851039 | -1.26734 | -0.64487 | -0.15954 | -0.07873 |
| C | 5.47384  | -2.17783 | -1.60632 | -0.10239 | -0.06959 |
| C | 4.416209 | -1.88191 | -2.51002 | -0.04047 | -0.02227 |
| C | 3.737525 | -0.61792 | -2.41532 | 0.021304 | -0.0299  |
| C | 2.080697 | 0.971326 | 0.581315 | -0.11985 | -0.09145 |
| C | 1.492531 | 1.256221 | 1.813991 | -0.15783 | -0.07164 |
| C | 1.706325 | 2.490949 | 2.433123 | -0.12877 | -0.08987 |
| C | 2.526304 | 3.436836 | 1.810562 | -0.16366 | -0.07324 |
| C | 3.131399 | 3.154087 | 0.585463 | -0.12487 | -0.09676 |
| C | 3.993921 | -2.81613 | -3.49757 | -0.1657  | -0.06932 |
| C | 2.945249 | -2.53037 | -4.34243 | -0.13015 | -0.07812 |
| C | 2.262996 | -1.29338 | -4.23338 | -0.17361 | -0.0755  |
| C | 2.649121 | -0.36078 | -3.2952  | -0.05408 | -0.06664 |
| C | -1.5937  | 11.39386 | -0.57538 | -0.16578 | -0.06938 |
| C | -0.30523 | 11.28889 | -0.10209 | -0.13012 | -0.07811 |
| C | 0.39847  | 10.06547 | -0.22601 | -0.17355 | -0.07554 |

|   |          |          |          |          |          |
|---|----------|----------|----------|----------|----------|
| C | -0.19012 | 8.97703  | -0.83252 | -0.05304 | -0.06654 |
| H | 0.505126 | 4.954824 | -2.05011 | 0.22286  | 0.08773  |
| H | 1.012222 | 8.206661 | -5.72601 | 0.178097 | 0.094577 |
| H | -0.96116 | 8.328812 | -4.23641 | 0.17897  | 0.09084  |
| H | 1.828482 | 3.550446 | -1.84621 | 0.222653 | 0.087715 |
| H | 5.510081 | 1.763042 | -3.0973  | 0.178639 | 0.090765 |
| H | 5.683851 | 3.426691 | -4.92282 | 0.178079 | 0.094569 |
| H | 7.015072 | 5.430963 | -8.04886 | 0.166797 | 0.089539 |
| H | 3.583544 | 9.009048 | -8.60596 | 0.16681  | 0.089543 |
| H | 8.283127 | 6.344847 | -10.0124 | 0.156816 | 0.083961 |
| H | 8.502721 | 8.015323 | -11.812  | 0.14841  | 0.082746 |
| H | 6.793773 | 9.802111 | -12.0872 | 0.148412 | 0.082745 |
| H | 4.85899  | 9.923793 | -10.5642 | 0.156826 | 0.083964 |
| H | -3.95906 | 7.227654 | -2.88704 | 0.162354 | 0.090231 |
| H | -5.21434 | 9.350509 | -2.58964 | 0.150176 | 0.08467  |
| H | -4.11764 | 11.30462 | -1.54083 | 0.154502 | 0.083235 |
| H | -2.37648 | 6.477758 | 0.327358 | 0.175078 | 0.08939  |
| H | -3.409   | 4.484957 | 1.365979 | 0.149835 | 0.082564 |
| H | -3.65652 | 2.382188 | 0.062545 | 0.150279 | 0.081346 |
| H | -2.8796  | 2.306978 | -2.29752 | 0.150791 | 0.082729 |
| H | -1.8735  | 4.30787  | -3.34132 | 0.178254 | 0.089208 |
| H | 5.513253 | 0.704097 | 0.189601 | 0.162135 | 0.090225 |
| H | 6.65341  | -1.49852 | 0.042689 | 0.150257 | 0.084701 |
| H | 5.973843 | -3.13493 | -1.68446 | 0.154519 | 0.083254 |
| H | 1.905251 | 0.019993 | 0.099445 | 0.17522  | 0.089357 |
| H | 0.858211 | 0.516368 | 2.284034 | 0.149777 | 0.082539 |
| H | 1.243127 | 2.712509 | 3.384862 | 0.150235 | 0.081321 |
| H | 2.708593 | 4.392176 | 2.284904 | 0.150743 | 0.082712 |
| H | 3.77822  | 3.881987 | 0.117087 | 0.17815  | 0.089185 |
| H | 4.513775 | -3.76342 | -3.56932 | 0.155492 | 0.082493 |
| H | 2.634886 | -3.24984 | -5.08833 | 0.149046 | 0.083006 |
| H | 1.432351 | -1.08149 | -4.89322 | 0.148617 | 0.083789 |
| H | 2.123562 | 0.578741 | -3.21692 | 0.191397 | 0.090961 |
| H | -2.14109 | 12.32283 | -0.47488 | 0.155446 | 0.082476 |
| H | 0.172491 | 12.13675 | 0.370421 | 0.149051 | 0.083002 |
| H | 1.40622  | 9.987377 | 0.159491 | 0.14863  | 0.083794 |
| H | 0.3524   | 8.048037 | -0.92101 | 0.191298 | 0.090987 |



**Table S3.** Cartesian coordinates and Mulliken and Lowdin charges of optimized structure of compound **4**

Total energy: 2525.42118500 Hartrees

| Atom | Cartesian Coordinates |          |          | Mulliken charges | Lowdin charges |
|------|-----------------------|----------|----------|------------------|----------------|
|      | x                     | y        | z        |                  |                |
| C    | -2.04378              | 3.738805 | -4.50576 | 0.336478         | 0.076628       |
| C    | -1.16047              | 4.139275 | -3.49475 | -0.21784         | -0.10916       |
| C    | -0.62474              | 5.436799 | -3.44359 | 0.001218         | 0.000485       |
| C    | -1.0223               | 6.37601  | -4.43043 | -0.03735         | -0.06102       |
| C    | -1.90588              | 5.964799 | -5.44937 | -0.08483         | -0.04002       |
| C    | -2.40453              | 4.677856 | -5.50085 | -0.14461         | -0.10349       |
| C    | 0.320319              | 5.842637 | -2.38066 | -0.00015         | 0.000615       |
| C    | 0.782321              | 7.183269 | -2.32228 | -0.03883         | -0.06014       |
| C    | 0.359275              | 8.157319 | -3.31923 | 0.067216         | 0.031876       |
| C    | -0.5331               | 7.74692  | -4.38906 | 0.067098         | 0.03197        |
| C    | 0.798594              | 4.924157 | -1.43097 | -0.21171         | -0.10765       |
| C    | 1.687463              | 5.300239 | -0.41628 | 0.333788         | 0.075733       |
| C    | 2.110983              | 6.64816  | -0.35089 | -0.14545         | -0.10312       |
| C    | 1.669036              | 7.557365 | -1.29225 | -0.08476         | -0.04009       |
| N    | 0.812204              | 9.408058 | -3.24311 | -0.376           | -0.1178        |
| C    | 0.41937               | 10.31281 | -4.20357 | 0.113174         | 0.00597        |
| C    | -0.46251              | 9.904722 | -5.26746 | 0.113499         | 0.00623        |
| N    | -0.92301              | 8.608711 | -5.32775 | -0.37596         | -0.11814       |
| C    | 0.877266              | 11.63258 | -4.1514  | -0.12198         | -0.06673       |
| C    | 0.493721              | 12.56796 | -5.12256 | -0.00213         | -0.02134       |
| C    | -0.39259              | 12.1561  | -6.19635 | -0.00177         | -0.02117       |
| C    | -0.84929              | 10.83139 | -6.24011 | -0.12205         | -0.06683       |
| C    | 0.948862              | 13.92594 | -5.09545 | -0.13188         | -0.06689       |
| C    | 0.561034              | 14.82082 | -6.05849 | -0.15308         | -0.08118       |
| C    | -0.31022              | 14.41562 | -7.11488 | -0.15302         | -0.08108       |
| C    | -0.77087              | 13.12635 | -7.17995 | -0.13188         | -0.0669        |
| N    | -2.55581              | 2.419908 | -4.53365 | -0.96453         | -0.13308       |
| N    | 2.152873              | 4.350221 | 0.52596  | -0.96508         | -0.13389       |
| C    | 3.456232              | 4.470827 | 1.114508 | 0.202596         | 0.03565        |
| C    | 1.368574              | 3.189642 | 0.842352 | 0.195287         | 0.036568       |
| C    | -3.84603              | 2.134648 | -5.09196 | 0.208857         | 0.03696        |

|   |          |          |          |          |          |
|---|----------|----------|----------|----------|----------|
| C | -1.83145 | 1.346597 | -3.90781 | 0.183147 | 0.030626 |
| C | -2.44142 | 0.549577 | -2.93449 | -0.10423 | -0.0749  |
| C | -1.74283 | -0.49494 | -2.32055 | -0.16512 | -0.12979 |
| C | -0.41118 | -0.73663 | -2.67155 | 0.259401 | 0.102811 |
| C | 0.20689  | 0.053712 | -3.65108 | -0.17945 | -0.09656 |
| C | -0.49895 | 1.078323 | -4.26889 | -0.08937 | -0.07416 |
| C | -4.96036 | 2.922025 | -4.77874 | -0.11175 | -0.08008 |
| C | -6.21748 | 2.635634 | -5.32064 | -0.17217 | -0.13212 |
| C | -6.37161 | 1.533411 | -6.16658 | 0.252327 | 0.096317 |
| C | -5.26595 | 0.729635 | -6.47363 | -0.17544 | -0.09532 |
| C | -4.01592 | 1.03203  | -5.94877 | -0.10676 | -0.0749  |
| C | 3.623856 | 4.294682 | 2.499673 | -0.10485 | -0.07546 |
| C | 4.884193 | 4.384522 | 3.077149 | -0.17522 | -0.09529 |
| C | 6.002788 | 4.670284 | 2.283628 | 0.253378 | 0.097375 |
| C | 5.850833 | 4.852414 | 0.905664 | -0.17211 | -0.13117 |
| C | 4.582429 | 4.739475 | 0.327896 | -0.10642 | -0.07749 |
| C | 0.041605 | 3.318116 | 1.268258 | -0.10218 | -0.07382 |
| C | -0.731   | 2.189245 | 1.556821 | -0.1621  | -0.12896 |
| C | -0.16401 | 0.916803 | 1.440201 | 0.256634 | 0.097486 |
| C | 1.168431 | 0.777415 | 1.035384 | -0.16348 | -0.09215 |
| C | 1.924481 | 1.903504 | 0.732331 | -0.10135 | -0.07081 |
| O | 0.382879 | -1.73381 | -2.11452 | -0.52891 | -0.22816 |
| O | 7.217342 | 4.751656 | 2.962917 | -0.52316 | -0.22934 |
| O | -0.8491  | -0.27737 | 1.691513 | -0.54481 | -0.2311  |
| O | -7.57671 | 1.148627 | -6.75341 | -0.52328 | -0.22975 |
| H | -0.90442 | 3.420557 | -2.73437 | 0.223777 | 0.088506 |
| H | -2.17705 | 6.690352 | -6.20166 | 0.175675 | 0.09325  |
| H | -3.067   | 4.383199 | -6.30077 | 0.180143 | 0.089351 |
| H | 0.496721 | 3.891283 | -1.48131 | 0.223833 | 0.088762 |
| H | 2.779727 | 6.96223  | 0.436459 | 0.179136 | 0.089352 |
| H | 1.990591 | 8.5875   | -1.25592 | 0.175988 | 0.093353 |
| H | 1.537509 | 11.91163 | -3.34129 | 0.165233 | 0.088771 |
| H | -1.5109  | 10.49719 | -7.02796 | 0.165271 | 0.088825 |
| H | 1.609617 | 14.2314  | -4.29387 | 0.155835 | 0.083454 |
| H | 0.913403 | 15.84321 | -6.02502 | 0.147419 | 0.082214 |
| H | -0.60423 | 15.13726 | -7.86542 | 0.14747  | 0.082235 |
| H | -1.43154 | 12.81719 | -7.98014 | 0.155904 | 0.083486 |
| H | -3.4674  | 0.74562  | -2.65558 | 0.16369  | 0.08774  |
| H | -2.2362  | -1.09252 | -1.56935 | 0.172213 | 0.085943 |
| H | 1.232284 | -0.16172 | -3.91376 | 0.170159 | 0.093265 |
| H | -0.02395 | 1.68265  | -5.02902 | 0.170115 | 0.091374 |

|   |          |          |          |          |          |
|---|----------|----------|----------|----------|----------|
| H | -4.84654 | 3.765923 | -4.11312 | 0.174596 | 0.09021  |
| H | -7.05639 | 3.265504 | -5.06517 | 0.171542 | 0.086532 |
| H | -5.40994 | -0.11412 | -7.13264 | 0.169747 | 0.093347 |
| H | -3.16243 | 0.416607 | -6.19533 | 0.171363 | 0.091328 |
| H | 2.760608 | 4.086067 | 3.115668 | 0.168704 | 0.090154 |
| H | 5.027236 | 4.251224 | 4.139535 | 0.169644 | 0.093304 |
| H | 6.69939  | 5.065833 | 0.27311  | 0.17276  | 0.087184 |
| H | 4.469329 | 4.865319 | -0.73959 | 0.175672 | 0.091233 |
| H | -0.39197 | 4.303597 | 1.364469 | 0.171466 | 0.091405 |
| H | -1.75497 | 2.318766 | 1.873299 | 0.173422 | 0.087099 |
| H | 1.585561 | -0.21489 | 0.948203 | 0.176694 | 0.094369 |
| H | 2.948553 | 1.794136 | 0.405085 | 0.171401 | 0.092524 |
| C | -2.20205 | -0.20898 | 2.216777 | -0.29409 | -0.03043 |
| C | 8.424036 | 5.046662 | 2.212032 | -0.29169 | -0.02903 |
| C | -8.76835 | 1.93344  | -6.48891 | -0.29134 | -0.0291  |
| C | -0.17736 | -2.57858 | -1.06867 | -0.32173 | -0.03734 |
| H | -2.50095 | -1.24071 | 2.370195 | 0.197975 | 0.08324  |
| H | -2.22768 | 0.325186 | 3.168833 | 0.187046 | 0.070644 |
| H | -2.88038 | 0.269088 | 1.506687 | 0.184648 | 0.067305 |
| H | 9.21923  | 5.064792 | 2.949747 | 0.200552 | 0.085114 |
| H | 8.629506 | 4.271549 | 1.470093 | 0.182193 | 0.067698 |
| H | 8.357104 | 6.019902 | 1.720212 | 0.182543 | 0.06803  |
| H | -9.55807 | 1.448707 | -7.0531  | 0.200405 | 0.084979 |
| H | -9.01994 | 1.927156 | -5.42567 | 0.1806   | 0.066836 |
| H | -8.64991 | 2.963393 | -6.83359 | 0.18254  | 0.067957 |
| H | 0.622466 | -3.26244 | -0.80411 | 0.193817 | 0.082963 |
| H | -0.46412 | -1.98737 | -0.19751 | 0.226937 | 0.07517  |
| H | -1.03334 | -3.14665 | -1.44111 | 0.173642 | 0.065139 |

**Table S4.** Cartesian coordinates and Mulliken and Lowdin charges of optimized structure of compound **5**

Total energy: 2748.34276402 Hartrees

| Atom | Cartesian Coordinates |          |          | Mulliken charges | Lowdin charges |
|------|-----------------------|----------|----------|------------------|----------------|
|      | x                     | y        | z        |                  |                |
| C    | -1.59749              | -7.28921 | 1.692705 | 0.305124         | 0.069725       |
| C    | -2.03284              | -8.0678  | 2.768201 | -0.19114         | -0.09376       |

|   |          |          |          |          |          |
|---|----------|----------|----------|----------|----------|
| C | -1.38086 | -9.25959 | 3.132385 | 0.01017  | -0.00211 |
| C | -0.23476 | -9.65532 | 2.395621 | -0.03997 | -0.05124 |
| C | 0.190884 | -8.86909 | 1.306262 | -0.08256 | -0.04037 |
| C | -0.47518 | -7.71256 | 0.948497 | -0.1313  | -0.09205 |
| C | -1.8427  | -10.0806 | 4.271477 | 0.003876 | -0.00156 |
| C | -1.11359 | -11.2377 | 4.651483 | -0.03877 | -0.05111 |
| C | 0.070207 | -11.6443 | 3.90304  | 0.067113 | 0.030413 |
| C | 0.503149 | -10.8575 | 2.764889 | 0.065233 | 0.030404 |
| C | -3.00486 | -9.75496 | 4.992021 | -0.18986 | -0.09563 |
| C | -3.42721 | -10.5081 | 6.090978 | 0.306602 | 0.069256 |
| C | -2.67699 | -11.6401 | 6.474892 | -0.13635 | -0.09285 |
| C | -1.55089 | -11.9953 | 5.755973 | -0.08135 | -0.03936 |
| N | 0.729785 | -12.7413 | 4.27217  | -0.37264 | -0.11204 |
| C | 1.839413 | -13.1189 | 3.550992 | 0.113798 | 0.006842 |
| C | 2.27002  | -12.3361 | 2.420237 | 0.112686 | 0.00686  |
| N | 1.574852 | -11.2064 | 2.055026 | -0.37228 | -0.1116  |
| C | 2.554389 | -14.2649 | 3.912728 | -0.11854 | -0.06403 |
| C | 3.686726 | -14.6649 | 3.190308 | -0.00167 | -0.01934 |
| C | 4.120562 | -13.8754 | 2.050918 | -0.00258 | -0.01936 |
| C | 3.398696 | -12.7285 | 1.694488 | -0.11845 | -0.06367 |
| C | 4.4388   | -15.834  | 3.53731  | -0.13046 | -0.06589 |
| C | 5.542914 | -16.2035 | 2.814672 | -0.15139 | -0.07778 |
| C | 5.969642 | -15.4268 | 1.694504 | -0.15153 | -0.0778  |
| C | 5.280809 | -14.301  | 1.326267 | -0.13016 | -0.06557 |
| N | -2.29104 | -6.09463 | 1.34402  | -0.9652  | -0.12522 |
| N | -4.60474 | -10.1477 | 6.807976 | -0.9677  | -0.12496 |
| C | -3.7212  | -6.04187 | 1.494611 | 0.17191  | 0.047013 |
| C | -1.59344 | -4.93962 | 0.900178 | 0.262283 | 0.070433 |
| C | -4.98298 | -8.78526 | 6.963739 | 0.255609 | 0.06867  |
| C | -5.46157 | -11.1792 | 7.325112 | 0.183147 | 0.049865 |
| C | -0.32634 | -4.61326 | 1.420452 | -0.13419 | -0.10179 |
| C | 0.342345 | -3.48077 | 0.972213 | -0.12649 | -0.05552 |
| C | -0.23437 | -2.6409  | 0.008425 | 0.059572 | -0.03845 |
| C | -1.50459 | -2.95833 | -0.50695 | -0.05003 | -0.05858 |
| C | -2.17281 | -4.09086 | -0.06943 | -0.13968 | -0.09246 |
| C | -4.31414 | -5.01695 | 2.245595 | -0.10059 | -0.08281 |
| C | -5.70151 | -4.97129 | 2.393027 | -0.16    | -0.06935 |
| C | -6.50613 | -5.95069 | 1.803592 | -0.12737 | -0.08149 |
| C | -5.91427 | -6.97582 | 1.058911 | -0.1659  | -0.07407 |
| C | -4.52871 | -7.021   | 0.898084 | -0.09729 | -0.08518 |
| C | -6.33569 | -8.40675 | 6.880194 | -0.13204 | -0.0986  |

|   |          |          |          |          |          |
|---|----------|----------|----------|----------|----------|
| C | -6.69844 | -7.07288 | 7.025708 | -0.12312 | -0.05524 |
| C | -5.72804 | -6.08569 | 7.246775 | 0.06183  | -0.03719 |
| C | -4.37534 | -6.46175 | 7.346436 | -0.05224 | -0.06001 |
| C | -4.0095  | -7.79168 | 7.212808 | -0.13752 | -0.09224 |
| C | -5.90726 | -11.1211 | 8.653983 | -0.10396 | -0.08482 |
| C | -6.74804 | -12.1161 | 9.153901 | -0.16343 | -0.07251 |
| C | -7.1393  | -13.185  | 8.341643 | -0.12805 | -0.08354 |
| C | -6.6884  | -13.2477 | 7.019901 | -0.16293 | -0.07237 |
| C | -5.86016 | -12.2476 | 6.508142 | -0.10392 | -0.08649 |
| N | -6.20658 | -4.75585 | 7.354548 | -0.26038 | -0.05479 |
| N | -5.31534 | -3.84747 | 7.506519 | -0.26865 | -0.06297 |
| C | -5.80204 | -2.51192 | 7.613627 | 0.043502 | -0.02439 |
| C | -7.16168 | -2.15636 | 7.588726 | -0.04508 | -0.0714  |
| C | -7.52432 | -0.81689 | 7.695487 | -0.15236 | -0.07638 |
| C | -6.54219 | 0.175328 | 7.827897 | -0.14024 | -0.06999 |
| C | -5.19015 | -0.17904 | 7.854776 | -0.14619 | -0.07931 |
| C | -4.8209  | -1.52015 | 7.748774 | -0.117   | -0.0662  |
| N | 0.535758 | -1.51501 | -0.37587 | -0.25858 | -0.0536  |
| N | 0.006987 | -0.74138 | -1.25006 | -0.26851 | -0.06341 |
| C | 0.790813 | 0.385801 | -1.63441 | 0.045141 | -0.02309 |
| C | 2.062867 | 0.683295 | -1.11613 | -0.04356 | -0.07028 |
| C | 2.741848 | 1.812531 | -1.56428 | -0.15213 | -0.0765  |
| C | 2.163762 | 2.651648 | -2.52771 | -0.14091 | -0.0712  |
| C | 0.898312 | 2.35544  | -3.04279 | -0.14668 | -0.08037 |
| C | 0.213045 | 1.225045 | -2.59677 | -0.11703 | -0.06676 |
| H | -2.88452 | -7.7198  | 3.329903 | 0.216124 | 0.090343 |
| H | 1.052832 | -9.20472 | 0.749757 | 0.181883 | 0.096005 |
| H | -0.14281 | -7.13189 | 0.100843 | 0.182865 | 0.092267 |
| H | -3.6046  | -8.91001 | 4.696118 | 0.222928 | 0.090214 |
| H | -2.98613 | -12.2243 | 7.328972 | 0.1802   | 0.091958 |
| H | -0.97008 | -12.8618 | 6.034039 | 0.180467 | 0.095736 |
| H | 2.209025 | -14.8335 | 4.765482 | 0.16852  | 0.090412 |
| H | 3.698998 | -12.1218 | 0.850929 | 0.169386 | 0.090799 |
| H | 4.114405 | -16.4217 | 4.386691 | 0.158472 | 0.084796 |
| H | 6.100943 | -17.0889 | 3.088531 | 0.150618 | 0.083929 |
| H | 6.844135 | -15.7363 | 1.137961 | 0.150828 | 0.084022 |
| H | 5.603056 | -13.7111 | 0.477582 | 0.158972 | 0.085049 |
| H | 0.120709 | -5.24251 | 2.175478 | 0.185679 | 0.092145 |
| H | 1.312965 | -3.2144  | 1.365786 | 0.162392 | 0.089518 |
| H | -1.93637 | -2.31169 | -1.25545 | 0.17539  | 0.091614 |
| H | -3.14212 | -4.3387  | -0.47683 | 0.182745 | 0.091602 |

|   |          |          |          |          |          |
|---|----------|----------|----------|----------|----------|
| H | -3.68882 | -4.26919 | 2.712678 | 0.177201 | 0.092473 |
| H | -6.14923 | -4.18186 | 2.981241 | 0.162593 | 0.088257 |
| H | -7.58016 | -5.91686 | 1.924823 | 0.154764 | 0.0839   |
| H | -6.53036 | -7.73453 | 0.59502  | 0.15434  | 0.084366 |
| H | -4.06832 | -7.80688 | 0.315761 | 0.172635 | 0.090303 |
| H | -7.08939 | -9.15664 | 6.691576 | 0.181506 | 0.092264 |
| H | -7.73172 | -6.76488 | 6.952383 | 0.161369 | 0.088971 |
| H | -3.63753 | -5.69812 | 7.539569 | 0.177288 | 0.092173 |
| H | -2.97196 | -8.07846 | 7.304198 | 0.185113 | 0.092107 |
| H | -5.59251 | -10.3013 | 9.284119 | 0.176059 | 0.091005 |
| H | -7.0862  | -12.0625 | 10.18007 | 0.155632 | 0.085176 |
| H | -7.78545 | -13.9585 | 8.733599 | 0.155112 | 0.083893 |
| H | -6.98973 | -14.0681 | 6.382351 | 0.155611 | 0.085121 |
| H | -5.52152 | -12.2885 | 5.482554 | 0.177433 | 0.091196 |
| H | -7.90078 | -2.93604 | 7.486659 | 0.174591 | 0.088329 |
| H | -8.5702  | -0.54011 | 7.67692  | 0.154337 | 0.082923 |
| H | -6.83164 | 1.214473 | 7.910076 | 0.155099 | 0.083159 |
| H | -4.43042 | 0.583874 | 7.957229 | 0.155251 | 0.084354 |
| H | -3.78485 | -1.82692 | 7.765961 | 0.162509 | 0.08723  |
| H | 2.48878  | 0.023817 | -0.37574 | 0.175099 | 0.0888   |
| H | 3.721339 | 2.043596 | -1.16674 | 0.153738 | 0.082632 |
| H | 2.697345 | 3.527669 | -2.87172 | 0.153602 | 0.082368 |
| H | 0.449757 | 3.000528 | -3.78616 | 0.153044 | 0.083213 |
| H | -0.76632 | 0.968502 | -2.97478 | 0.160945 | 0.086516 |

**Table S5.** Cartesian coordinates and Mulliken and Lowdin charges of optimized structure of compound **6**

Total energy: 1605.64834179 Hartrees

| Atom | Cartesian Coordinates |          |          | Mulliken charges | Lowdin charges |
|------|-----------------------|----------|----------|------------------|----------------|
|      | x                     | y        | z        |                  |                |
| C    | -2.06344              | 0.485868 | -0.33247 | 0.374937         | 0.077209       |
| C    | -2.20396              | 0.751756 | 1.040202 | -0.21778         | -0.11399       |
| C    | -3.44386              | 1.036723 | 1.632476 | -0.00493         | 0.003626       |
| C    | -4.59921              | 1.063939 | 0.806708 | -0.05119         | -0.06247       |
| C    | -4.45889              | 0.804863 | -0.56831 | -0.08766         | -0.03392       |

|   |          |          |          |          |          |
|---|----------|----------|----------|----------|----------|
| C | -3.23043 | 0.517497 | -1.13403 | -0.16398 | -0.11931 |
| C | -3.57238 | 1.321318 | 3.081192 | -0.00481 | 0.003801 |
| C | -4.85381 | 1.587538 | 3.632605 | -0.05159 | -0.06272 |
| C | -6.04236 | 1.602002 | 2.79038  | 0.071253 | 0.032294 |
| C | -5.91308 | 1.34866  | 1.368076 | 0.070771 | 0.032247 |
| C | -2.46033 | 1.325529 | 3.937295 | -0.21822 | -0.11457 |
| C | -2.5645  | 1.590786 | 5.313499 | 0.377129 | 0.077447 |
| C | -3.8531  | 1.855569 | 5.838279 | -0.16517 | -0.11965 |
| C | -4.96057 | 1.846061 | 5.010687 | -0.08815 | -0.03379 |
| N | -7.22975 | 1.851141 | 3.339885 | -0.37679 | -0.11719 |
| C | -8.34206 | 1.871317 | 2.52841  | 0.113968 | 0.006341 |
| C | -8.21218 | 1.630226 | 1.11389  | 0.113621 | 0.006306 |
| N | -6.97613 | 1.369434 | 0.565955 | -0.37672 | -0.11711 |
| C | -9.60304 | 2.127959 | 3.074238 | -0.12091 | -0.06614 |
| C | -10.747  | 2.157103 | 2.264387 | -0.00209 | -0.02078 |
| C | -10.6155 | 1.917822 | 0.838294 | -0.00208 | -0.02079 |
| C | -9.34753 | 1.659611 | 0.299076 | -0.12089 | -0.0661  |
| C | -12.0515 | 2.417024 | 2.796016 | -0.13153 | -0.06661 |
| C | -13.1543 | 2.441294 | 1.982508 | -0.15258 | -0.08017 |
| C | -13.0249 | 2.20673  | 0.579832 | -0.15261 | -0.08018 |
| C | -11.7962 | 1.953679 | 0.027869 | -0.13148 | -0.06659 |
| N | -1.42428 | 1.570813 | 6.138658 | -0.66596 | -0.19042 |
| N | -0.7972  | 0.219396 | -0.88652 | -0.66594 | -0.19099 |
| C | -0.60686 | 0.197213 | -2.34549 | -0.18532 | -0.04848 |
| C | 0.837655 | 0.561754 | -2.68727 | -0.10472 | 0.026234 |
| O | 1.780851 | -0.31139 | -1.99797 | -0.46354 | -0.28802 |
| C | 1.606045 | -0.22275 | -0.55232 | -0.09749 | 0.024042 |
| C | 0.184584 | -0.61478 | -0.16462 | -0.20272 | -0.04074 |
| C | -1.56058 | 1.615892 | 7.60376  | -0.18538 | -0.04858 |
| C | -0.35641 | 0.943774 | 8.262443 | -0.10548 | 0.026146 |
| O | 0.894944 | 1.53925  | 7.808582 | -0.46326 | -0.28787 |
| C | 1.027369 | 1.420436 | 6.360654 | -0.09797 | 0.024057 |
| C | -0.13639 | 2.114368 | 5.662117 | -0.20196 | -0.04087 |
| H | -1.31465 | 0.773084 | 1.648047 | 0.198999 | 0.07498  |
| H | -5.3519  | 0.820158 | -1.17528 | 0.176637 | 0.093974 |
| H | -3.17953 | 0.289937 | -2.18765 | 0.170043 | 0.083527 |
| H | -1.49036 | 1.080877 | 3.537434 | 0.20029  | 0.074929 |
| H | -3.98255 | 2.09553  | 6.882203 | 0.170122 | 0.083482 |
| H | -5.94263 | 2.057186 | 5.407086 | 0.17662  | 0.093989 |
| H | -9.67154 | 2.304554 | 4.1392   | 0.165722 | 0.089    |
| H | -9.22047 | 1.476058 | -0.75932 | 0.165739 | 0.089008 |

|   |          |          |          |          |          |
|---|----------|----------|----------|----------|----------|
| H | -12.1479 | 2.595068 | 3.85966  | 0.15649  | 0.083781 |
| H | -14.1332 | 2.639233 | 2.398529 | 0.148426 | 0.08275  |
| H | -13.9078 | 2.230659 | -0.04499 | 0.148428 | 0.08275  |
| H | -11.6963 | 1.775267 | -1.03539 | 0.1565   | 0.083784 |
| H | -1.2671  | 0.930042 | -2.8061  | 0.196208 | 0.085126 |
| H | -0.84377 | -0.79118 | -2.76507 | 0.183452 | 0.064904 |
| H | 1.032694 | 1.603254 | -2.40848 | 0.170348 | 0.060737 |
| H | 1.03244  | 0.42749  | -3.7486  | 0.184877 | 0.077232 |
| H | 1.821627 | 0.798411 | -0.21783 | 0.167061 | 0.058688 |
| H | 2.333987 | -0.90809 | -0.12444 | 0.182007 | 0.076442 |
| H | 0.05251  | -0.50349 | 0.907965 | 0.181203 | 0.078779 |
| H | 0.02531  | -1.67405 | -0.41196 | 0.186878 | 0.068876 |
| H | -2.46006 | 1.078359 | 7.898732 | 0.196305 | 0.085125 |
| H | -1.64432 | 2.65102  | 7.965167 | 0.183832 | 0.065097 |
| H | -0.35654 | -0.12735 | 8.031525 | 0.170563 | 0.060805 |
| H | -0.37571 | 1.082127 | 9.340807 | 0.185085 | 0.07739  |
| H | 1.059581 | 0.361455 | 6.080317 | 0.167217 | 0.058873 |
| H | 1.974397 | 1.893015 | 6.110843 | 0.182103 | 0.076543 |
| H | -0.0493  | 1.982091 | 4.587414 | 0.181051 | 0.078745 |
| H | -0.08785 | 3.192719 | 5.87027  | 0.187023 | 0.068996 |
